# Supplementary material for: Overcoming GNA/RNA base-pairing limitations using isonucleotides improves the pharmacodynamic activity of ESC+ GalNAc-siRNAs
Source: PubMed Central journal article supplement (PMC8565336; doi:10.1093/nar/gkab916), 2021-10-14

## **Supporting Information**

### **Overcoming GNA/RNA Base-Pairing Limitations Using Isonucleotides Improves the Pharmacodynamic Activity of ESC+ GalNAc-siRNAs**

Mark K. Schlegel<sup>1\*</sup>, Shigeo Matsuda<sup>1</sup>, Christopher R. Brown<sup>1</sup>, Joel M. Harp<sup>2</sup>, Joseph D. Barry<sup>1</sup>, Daniel Berman<sup>1</sup>, Adam Castoreno<sup>1</sup>, Sally Schofield<sup>1</sup>, John Szeto<sup>1</sup>, Muthiah Manoharan<sup>1</sup>, Klaus Charissé<sup>1</sup>, Martin Egli<sup>2</sup>, and Martin A. Maier<sup>1</sup>

<sup>1</sup> *Alnylam Pharmaceuticals, Inc., Cambridge, MA 02142, USA*

<sup>2</sup> *Department of Biochemistry, School of Medicine, Vanderbilt University, Nashville, TN 37232, USA*

*\*Corresponding author: mschlegel@alnylam.com*

#### **Table of Contents**

|                                                                       |     |
|-----------------------------------------------------------------------|-----|
| 1. RNA sequences for $T_M$ evaluation.....                            | S2  |
| 2. X-ray diffraction data collection and statistics .....             | S3  |
| 3. Sequences of GalNAc-siRNAs.....                                    | S4  |
| 4. RT-qPCR primers and probes.....                                    | S6  |
| 5. Off-target silencing in dual-luciferase reporter and analysis..... | S7  |
| 6. Additional plots and analyses from <i>in vitro</i> RNAseq .....    | S8  |
| 7. Mass Identification of siRNA Metabolites in Mouse Liver.....       | S13 |
| 8. NMR Spectra .....                                                  | S16 |

**RNA sequences for  $T_M$  evaluation****Table S1.** RNA duplexes for the evaluation of thermal stability

| Duplex    | Sequence A (5' to 3')  | Sequence B (5' to 3')              | Avg. $T_M$     | $\Delta T_M^a$ | $\Delta\Delta T_M$ |
|-----------|------------------------|------------------------------------|----------------|----------------|--------------------|
| <b>R1</b> | UACAGUCUAUGU           | ACAUAGACUGUA                       | $53.1 \pm 0.0$ | -              | -                  |
| <b>R2</b> | UACAGUCUAUGU           | ACAUAG <u>A</u> CUGUA              |                | -7.7           | -                  |
| <b>R3</b> | UACAG <u>T</u> CUAUGU  | ACAUAGACUGUA                       |                | -4.7           | -                  |
| <b>R4</b> | UACAGU <u>C</u> UAUGU  | ACAUAGACUGUA                       | $35.9 \pm 0.3$ | -17.2          | -                  |
| <b>R5</b> | UACAGU <u>C</u> UAUGU  | ACAU <u>A</u> <sup>i</sup> GACUGUA |                | -11.5          | 5.7                |
| <b>R6</b> | UACAGU <u>i</u> CUAUGU | ACAUAGACUGUA                       | $40.6 \pm 0.4$ | -12.6          | 4.6                |
| <b>R7</b> | UACAGUCUAUGU           | ACAUAG <u>A</u> CUGUA              | $40.1 \pm 0.4$ | -13.0          | -                  |
| <b>R8</b> | UACAGU <u>i</u> CUAUGU | ACAUAG <u>A</u> CUGUA              |                | -10.5          | 2.5                |
| <b>R9</b> | UACAGUCUAUGU           | ACAU <u>A</u> <sup>i</sup> GACUGUA | $47.0 \pm 0.7$ | -6.1           | 6.9                |

Uppercase bold underlined represent (S)-GNA modifications to Cytosine and Guanosine.

<sup>a</sup> $\Delta T_M$  data for **R2-R3**, **R5**, and **R8** were adapted from a previous publication where stabilities were measured under the same conditions, but on a different spectrophotometer (Schlegel *et. al.* JACS 2017).

**X-ray diffraction data collection and statistics****Table S2.** X-ray diffraction data collection and refinement statistics

| Parameter                          | 5'-CGCG <u>A</u> A-BrU-UAGCG-3'                    |
|------------------------------------|----------------------------------------------------|
| Wavelength [Å]                     | 0.9184                                             |
| Resolution range [Å]               | 23.76 - 1.78 (1.83 - 1.78)                         |
| Space group                        | $P3_2$                                             |
| Unit cell [Å]; [°]                 | $a=b=29.37, c=133.14; \alpha=\beta=90, \gamma=120$ |
| Total reflections                  | 330,087 (9,847)                                    |
| Unique reflections                 | 12,301 (1,274)                                     |
| Multiplicity                       | 26.7 (10.1)                                        |
| Completeness (%)                   | 99.61 (99.07)                                      |
| Mean I/sigma(I)                    | 17.8 (1.1)                                         |
| Wilson B-factor [Å]                | 40.29                                              |
| R-merge                            | 0.082 (1.369)                                      |
| R-meas                             | 0.092 (1.544)                                      |
| R-pim                              | 0.017 (0.482)                                      |
| CC1/2                              | 0.999 (0.792)                                      |
| Reflections used in refinement     | 12,298 (1,272)                                     |
| Reflections used for R-free        | 556 (52)                                           |
| R-work                             | 0.1945 (0.4114)                                    |
| R-free                             | 0.2260 (0.4289)                                    |
| Number of non-hydrogen atoms       | 1,024                                              |
| macromolecules                     | 852                                                |
| ligands                            | 156                                                |
| solvent                            | 16                                                 |
| RNA residues                       | 48                                                 |
| RMS, bonds [Å]                     | 0.002                                              |
| RMS, angles [°]                    | 0.46                                               |
| Clashscore                         | 2.67                                               |
| Average B-factor [Å <sup>2</sup> ] | 47.8                                               |

Numbers in parentheses refer to the highest resolution shell

**Sequences of GalNAc-siRNAs****Table S3.** siRNA duplexes used in these studies

| siRNA | mRNA Target | Passenger | Sequence (5' to 3')      | Guide | Sequence (5' to 3')                                | Avg. $T_M$ | $\Delta T_M$ | $\Delta\Delta T_M$ |
|-------|-------------|-----------|--------------------------|-------|----------------------------------------------------|------------|--------------|--------------------|
| D1    | <i>Hao1</i> | P1        | g●a●auguGaaAGucaucgacaaL | G1    | u●U●gucGaUGacuuUcAcauuc●u●g                        | 66.5 ± 0.0 | -            | -                  |
| D2    | <i>Hao1</i> | P1        | g●a●auguGaaAGucaucgacaaL | G2    | u●U●guC <u>G</u> aUGacuuUcAcauuc●u●g               | 58.6 ± 0.1 | -7.9         | -                  |
| D3    | <i>Hao1</i> | P1        | g●a●auguGaaAGucaucgacaaL | G3    | u●U●gu <sup>i</sup> C <u>G</u> aUGacuuUcAcauuc●u●g | 61.1 ± 0.1 | -5.4         | 2.5                |
| D4    | <i>Ttr</i>  | P2        | a●a●caguGuUCUugcucuauaaL | G4    | u●U●auaGagcaagaAcAcuguu●u●u                        | 66.0 ± 0.0 | -            | -                  |
| D5    | <i>Ttr</i>  | P2        | a●a●caguGuUCUugcucuauaaL | G5    | u●U●aua <u>G</u> agcaagaAcAcuguu●u●u               | 59.0 ± 0.0 | -7.0         | -                  |
| D6    | <i>Ttr</i>  | P2        | a●a●caguGuUCUugcucuauaaL | G6    | u●U●aua <sup>i</sup> <u>G</u> agcaagaAcAcuguu●u●u  | 62.3 ± 0.4 | -3.7         | 3.3                |
| D7    | <i>F12</i>  | P3        | u●g●cuuuGaGCCucagcuucuaL | G7    | u●A●gaagcugaggcUcAaagca●c●u                        | 79.3 ± 0.4 | -            | -                  |
| D8    | <i>F12</i>  | P3        | u●g●cuuuGaGCCucagcuucuaL | G8    | u●A●gaag <u>C</u> ugaggcUcAaagca●c●u               | 71.3 ± 0.4 | -8.0         | -                  |
| D9    | <i>F12</i>  | P3        | u●g●cuuuGaGCCucagcuucuaL | G9    | u●A●gaag <sup>i</sup> <u>C</u> ugaggcUcAaagca●c●u  | 73.3 ± 0.4 | -6.0         | 2.0                |
| D10   | <i>Ttr</i>  | P4        | u●u●cuugCuCUAuaaacgguguL | G10   | a●C●acgguuuauagAgCaagaa●c●a                        | 70.0 ± 0.7 | -            | -                  |
| D11   | <i>Ttr</i>  | P4        | u●u●cuugCuCUAuaaacgguguL | G11   | a●C●ac <u>G</u> guuuuauagAgCaagaa●c●a              | 64.0 ± 0.7 | -6.0         | -                  |
| D12   | <i>Ttr</i>  | P4        | u●u●cuugCuCUAuaaacgguguL | G12   | a●C●ac <sup>i</sup> <u>G</u> guuuuauagAgCaagaa●c●a | 67.3 ± 0.4 | -2.7         | 3.3                |
| D13   | <i>Ttr</i>  | P4        | u●u●cuugCuCUAuaaacgguguL | G13   | a●C●acg <u>G</u> uuuuauagAgCaagaa●c●a              | 63.3 ± 0.4 | -6.7         | -                  |
| D14   | <i>Ttr</i>  | P4        | u●u●cuugCuCUAuaaacgguguL | G14   | a●C●acg <sup>i</sup> <u>G</u> uuuuauagAgCaagaa●c●a | 67.3 ± 0.4 | -2.7         | 4.0                |
| D15   | <i>Ttr</i>  | P5        | a●g●gaucUuGCCaaagcaguuaL | G15   | u●U●acugcuuuggcAaGauccu●g●g                        | 74.3 ± 0.4 | -            | -                  |
| D16   | <i>Ttr</i>  | P5        | a●g●gaucUuGCCaaagcaguuaL | G16   | u●U●acu <u>G</u> cuuuggcAaGauccu●g●g               | 66.8 ± 0.4 | -7.5         | -                  |
| D17   | <i>Ttr</i>  | P5        | a●g●gaucUuGCCaaagcaguuaL | G17   | u●U●acu <sup>i</sup> <u>G</u> cuuuggcAaGauccu●g●g  | 70.0 ± 0.0 | -4.3         | 2.8                |

|     |            |    |                                    |     |                                                                   |            |      |     |
|-----|------------|----|------------------------------------|-----|-------------------------------------------------------------------|------------|------|-----|
| D18 | <i>Ttr</i> | P5 | a●g●gauc <i>UuGCC</i> CaaagcaguaaL | G18 | u●U●acug <u>C</u> uuuggcAaGauccu●g●g                              | 66.8 ± 0.4 | -7.5 | -   |
| D19 | <i>Ttr</i> | P5 | a●g●gauc <i>UuGCC</i> CaaagcaguaaL | G19 | u●U●acug <sup>i</sup> <u>C</u> uuuggcAaGauccu●g●g                 | 68.0 ± 0.0 | -6.3 | 1.2 |
| D20 | <i>Ttr</i> | P6 | g●a●ccag <i>GaUCU</i> ugccaaagcaL  | G20 | u●G●c <u>uu</u> ggcaagaUcCugguc●c●u                               | 80.0 ± 0.7 | -    | -   |
| D21 | <i>Ttr</i> | P6 | g●a●ccag <i>GaUCU</i> ugccaaagcaL  | G21 | u●G●c <u>uuu</u> <u>G</u> gcaagaUcCugguc●c●u                      | 74.0 ± 0.7 | -6.0 | -   |
| D22 | <i>Ttr</i> | P6 | g●a●ccag <i>GaUCU</i> ugccaaagcaL  | G22 | u●G●c <u>uuu</u> <sup>i</sup> <u>G</u> gcaagaUcCugguc●c●u         | 77.3 ± 0.4 | -2.7 | 3.3 |
| D23 | <i>Ttr</i> | P7 | g●a●ucuu <i>GcCAA</i> agcaguagcaL  | G23 | u●G●c <u>ua</u> cugc <u>uu</u> gGcAagauc●c●u                      | 76.8 ± 0.4 | -    | -   |
| D24 | <i>Ttr</i> | P7 | g●a●ucuu <i>GcCAA</i> agcaguagcaL  | G24 | u●G●c <u>ua</u> <u>C</u> ugc <u>uu</u> gGcAagauc●c●u              | 68.8 ± 0.4 | -8.0 | -   |
| D25 | <i>Ttr</i> | P7 | g●a●ucuu <i>GcCAA</i> agcaguagcaL  | G25 | u●G●c <u>ua</u> <sup>i</sup> <u>C</u> ugc <u>uu</u> gGcAagauc●c●u | 70.3 ± 0.4 | -6.5 | 1.5 |
| D26 | <i>F12</i> | P8 | g●g●agccCa <i>AGA</i> aagugaaagaL  | G26 | u●C● <u>uuu</u> cac <u>uu</u> cuUgGgcucc●a●c                      | 77.0 ± 0.7 | -    | -   |
| D27 | <i>F12</i> | P8 | g●g●agccCa <i>AGA</i> aagugaaagaL  | G27 | u●C● <u>uuu</u> <u>C</u> ac <u>uu</u> cuUgGgcucc●a●c              | 69.8 ± 0.4 | -7.2 | -   |
| D28 | <i>F12</i> | P8 | g●g●agccCa <i>AGA</i> aagugaaagaL  | G28 | u●C● <u>uuu</u> <sup>i</sup> <u>C</u> ac <u>uu</u> cuUgGgcucc●a●c | 71.3 ± 0.4 | -5.7 | 1.5 |

Italicized uppercase, lower-case, and uppercase bold underlined represent 2'-deoxy-2'-F, 2'-OMe, and (S)-GNA modifications, respectively to Adenosine, Cytosine, Guanosine, and Uridine. "L" represents the tri-N-acetylgalactosamine ligand. Phosphorothioate linkages are indicated by the "●" symbol.

**RT-qPCR primers and probes****Table S4.** Guide Strand RT-qPCR Primers and Probes

| siRNAs               | Primer ID              | Primer Sequence (5' to 3')                             |
|----------------------|------------------------|--------------------------------------------------------|
| <b>D1, D2, D3</b>    | RT                     | GTCGTATCCAGTGCAGGGTCCGAGGTATTCGCACTGGATACGACCAGAATGTGA |
|                      | Forward qPCR           | GCCGCGCTTGTCGATGACTT                                   |
|                      | TaqMan Probe           | CTGGATACGACCAGAATGTG                                   |
|                      | Universal Reverse qPCR | GTGCAGGGTCCGAGGT                                       |
| <b>D4, D5, D6</b>    | RT                     | GTCGTATCCAGTGCAGGGTCCGAGGTATTCGCACTGGATACGACAAAACAGTGT |
|                      | Forward qPCR           | GCCGCGCTTATAGAGCAAG                                    |
|                      | TaqMan Probe           | CTGGATACGACAAAACAGT                                    |
|                      | Universal Reverse qPCR | GTGCAGGGTCCGAGGT                                       |
| <b>D7, D8, D9</b>    | RT                     | GTCGTATCCAGTGCAGGGTCCGAGGTATTCGCACTGGATACGACAGTGCTTTGA |
|                      | Forward qPCR           | GCCGCGCTAGAAGCTGAGGC                                   |
|                      | TaqMan Probe           | CTGGATACGACAGTGCTTT                                    |
|                      | Universal Reverse qPCR | GTGCAGGGTCCGAGGT                                       |
| <b>D10, D11, D12</b> | RT                     | GTCGTATCCAGTGCAGGGTCCGAGGTATTCGCACTGGATACGACTGTTCTTGCT |
|                      | Forward qPCR           | GCCGCGCACACGGTTTATAG                                   |
|                      | TaqMan Probe           | CTGGATACGACTGTTCTTG                                    |
|                      | Universal Reverse qPCR | GTGCAGGGTCCGAGGT                                       |

**Off-target silencing in dual-luciferase reporter and analysis**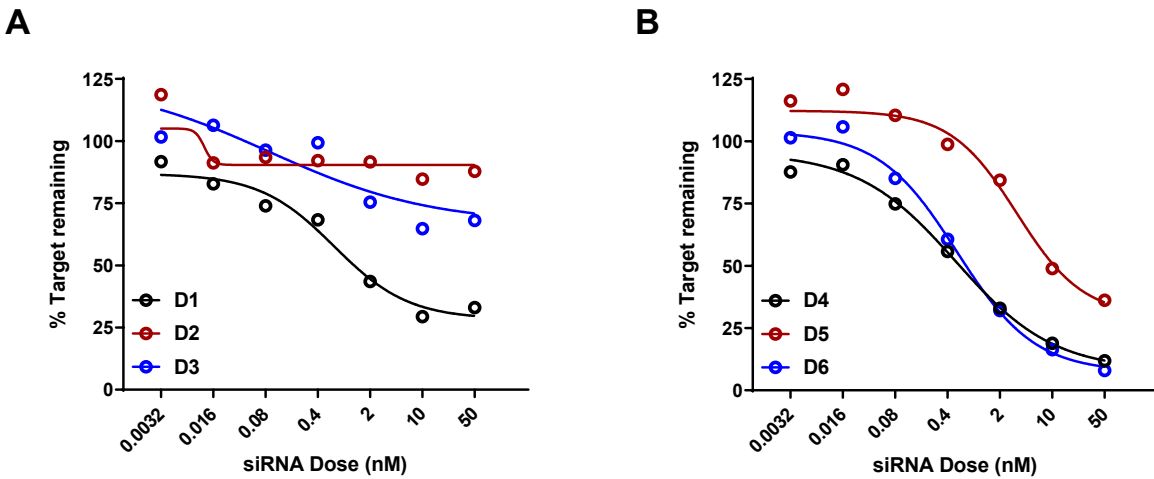

**Figure S1.** Off-target silencing of parent and GNA-modified GalNAc-siRNAs **D1-D3** (A) or **D4-D6** (B) in the dual-luciferase off-target reporter.

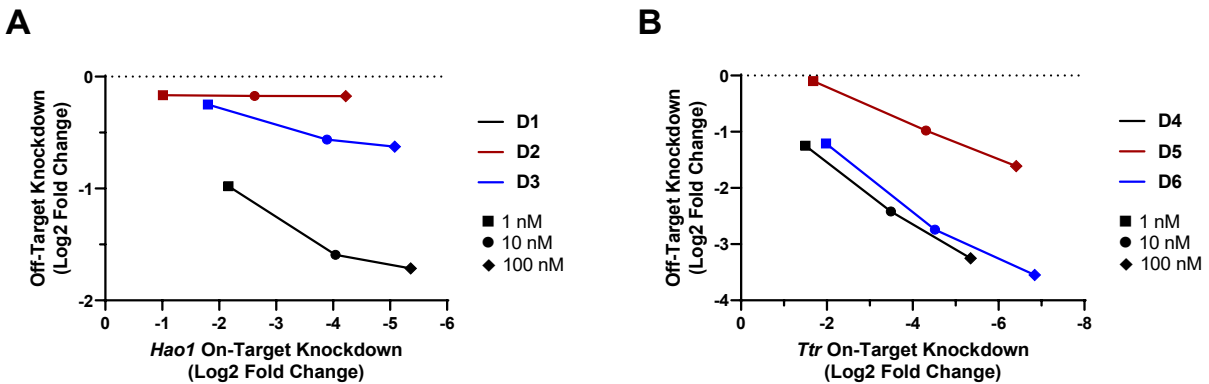

**Figure S2.** Correlation between off- and on-target activity across doses of **D1-D3** (A) or **D4-D6** (B). On-target activity is the log<sub>2</sub> transformed knockdown after free uptake in PMH (see Figure 6). Off-target activity is the log<sub>2</sub> transformed knockdown in the dual-luciferase reporter assay was inferred from the fitted curves in Figure S1.

**Additional plots and analyses from *in vitro* RNAseq**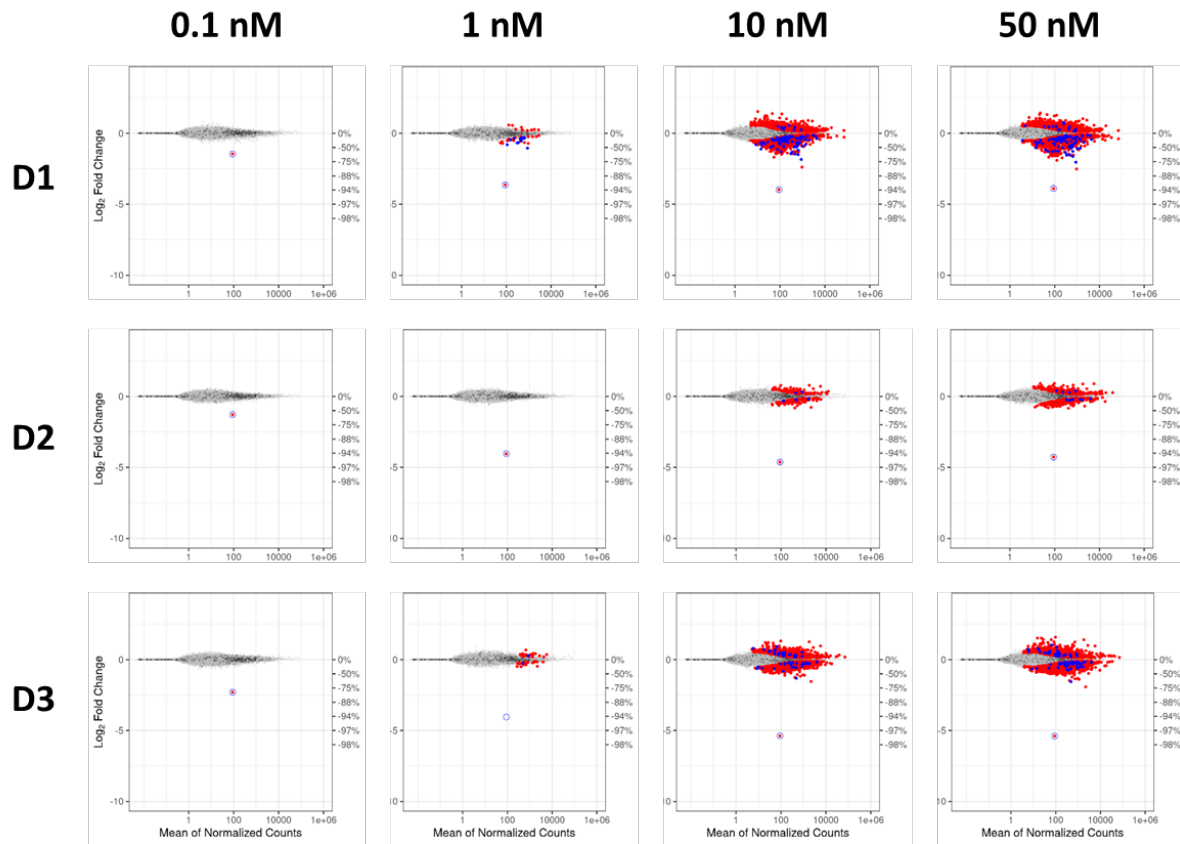

**Figure S3.**  $\text{Log}_2$  fold change (MA plot) showing transcriptional dysregulation in primary mouse hepatocytes after transfection of *Hao1*-targeting siRNAs **D1-D3**. Dots represent individual mouse transcripts, their average read count, and the level of change in expression compared to the mock control. Whereas grey dots represent genes which were not determined to be differentially expressed after siRNA treatment relative to the control, the blue and red dots represent differentially expressed genes (false discovery rate  $< 0.05$ ) with or without a canonical miRNA match (8mer, 7mer-A1, 7mer-m8) to the guide seed region, respectively. On-target knockdown is represented by the circled dot.



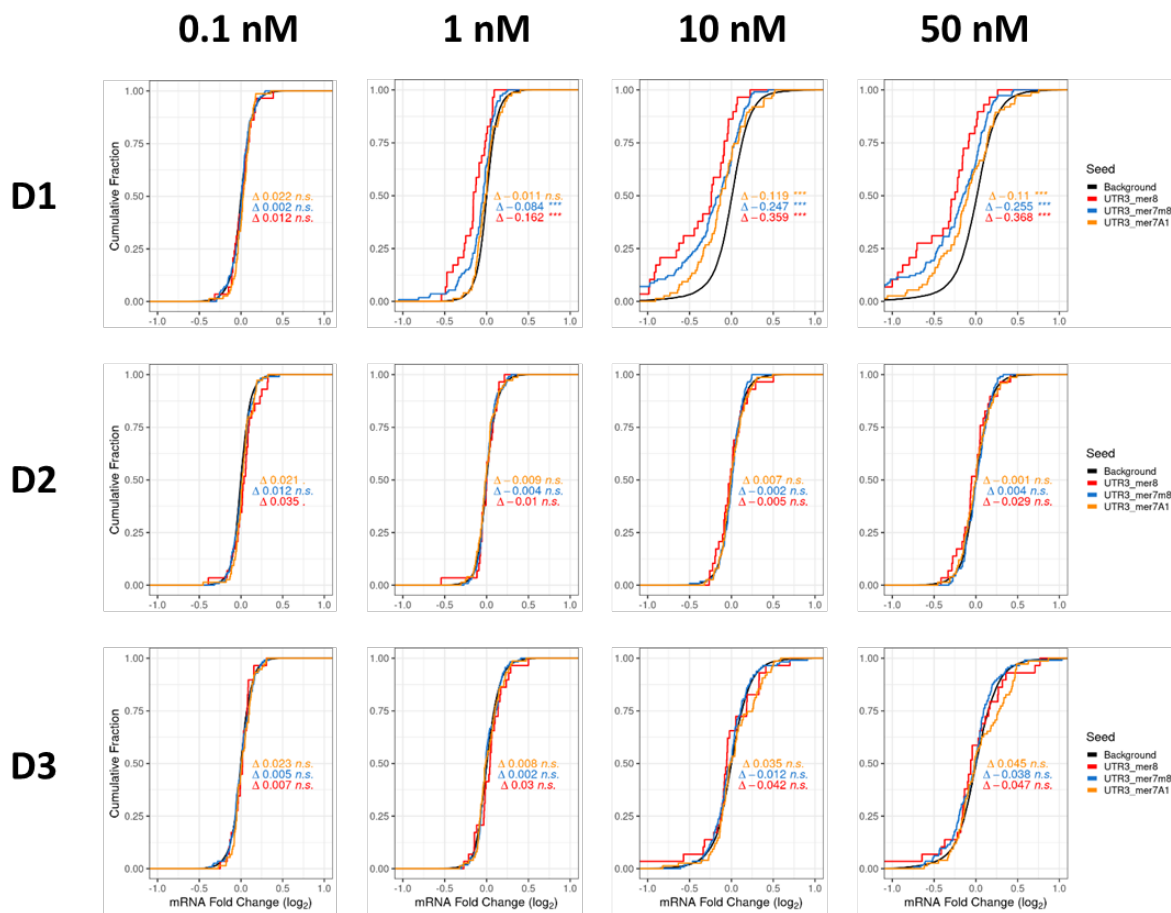

**Figure S4.** Cumulative distribution function (CDF) plots relative to control after treatment with the designated *Hao1*-targeting siRNAs **D1-D3** at the specified dose. Each colored line represents the impact of different types of seed matches in the 3'-UTR on the cumulative distribution of expression change of transcripts; black = background, yellow = mer7-A1, blue = mer7-m8, red = mer8. Delta estimates indicate the magnitude of each CDF shift vs. background.

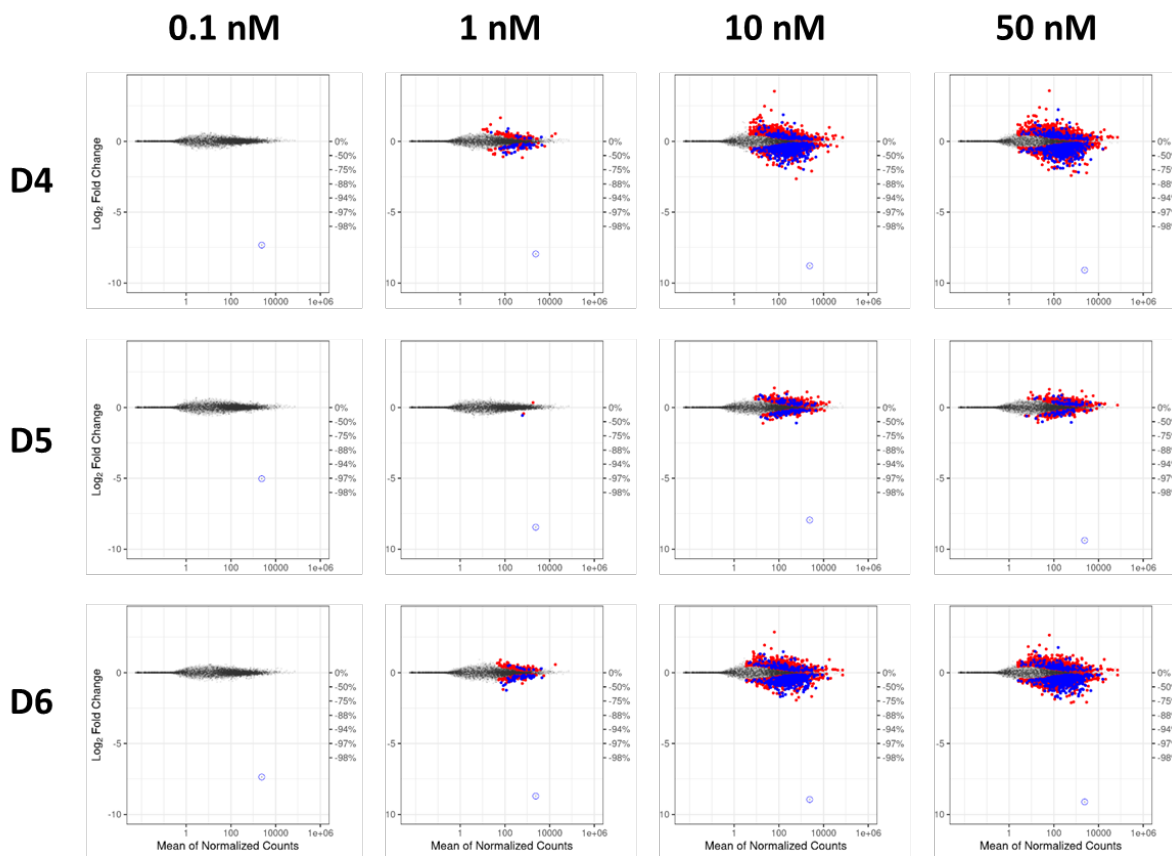

**Figure S5.** Log<sub>2</sub> fold change (MA plot) showing transcriptional dysregulation in primary mouse hepatocytes after transfection of *Ttr*-targeting siRNAs **D4-D6**. Dots represent individual mouse transcripts, their average read count, and the level of change in expression compared to the mock control. Whereas grey dots represent genes which were not determined to be differentially expressed after siRNA treatment relative to the control, the blue and red dots represent differentially expressed genes (false discovery rate <0.05) with or without a canonical miRNA match (8mer, 7mer-A1, 7mer-m8) to the guide seed region, respectively. On-target knockdown is represented by the circled dot.

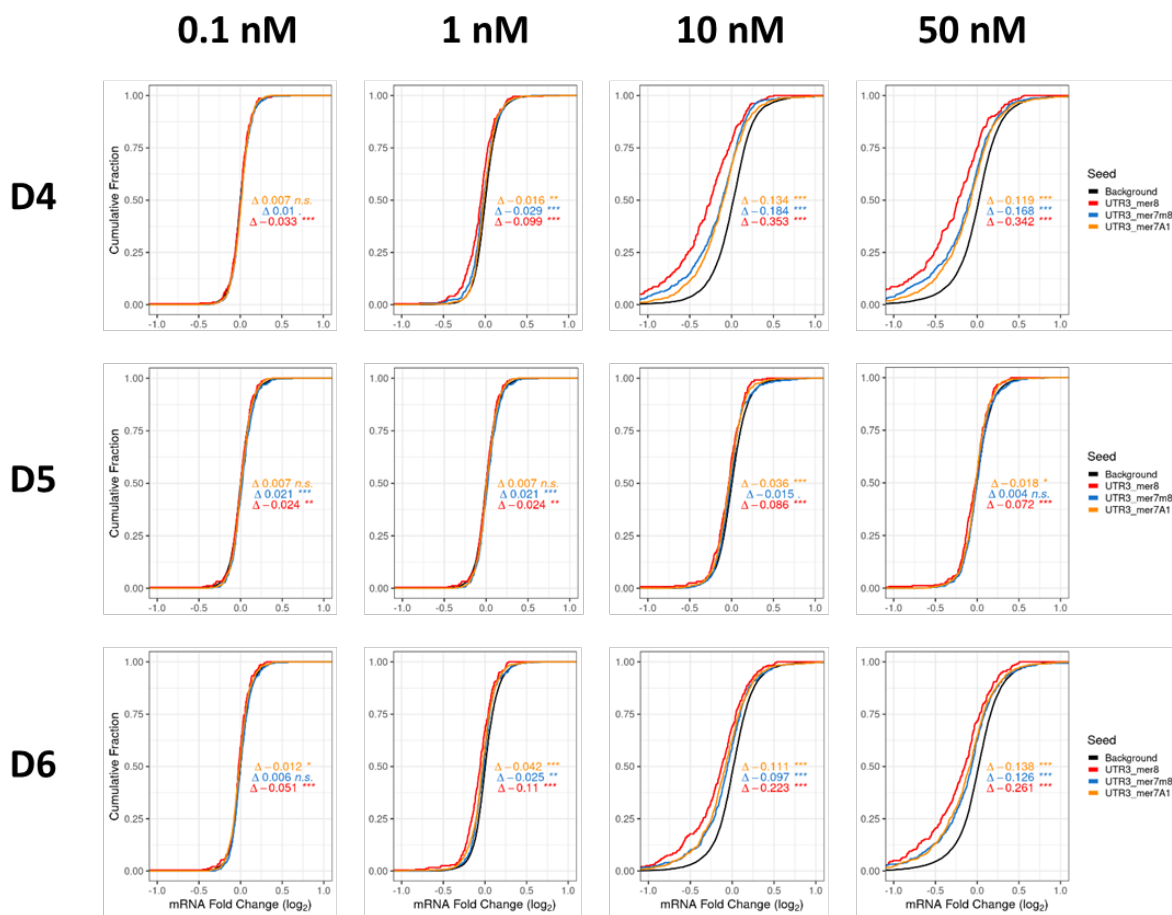

**Figure S6.** Cumulative distribution function (CDF) plots relative to control after treatment with the designated *Ttr*-targeting siRNAs **D4-D6** at the specified dose. Each colored line represents the impact of different types of seed matches in the 3'-UTR on the cumulative distribution of expression change of transcripts; black = background, yellow = mer7-A1, blue = mer7-m8, red = mer8. Delta estimates indicate the magnitude of each CDF shift vs. background.

**Table S5.** Summary of *in vitro* RNA sequencing data

| siRNA     | Dose (nM) | On-Target <sup>a</sup> (%KD) | CDF Shift |        |        | DEGs       |          |            |
|-----------|-----------|------------------------------|-----------|--------|--------|------------|----------|------------|
|           |           |                              | mer8      | mer7m8 | mer7A1 | Total Down | Total Up | Total DEGs |
| <b>D1</b> | 0.1       | -1.46 (64)                   | 0.012     | 0.002  | 0.022  | 0          | 1        | 1          |
|           | 1         | -3.64 (92)                   | -0.162    | -0.084 | -0.011 | 10         | 37       | 47         |
|           | 10        | -3.98 (94)                   | -0.359    | -0.247 | -0.119 | 1152       | 1321     | 2473       |
|           | 50        | -3.89 (93)                   | -0.368    | -0.255 | -0.110 | 1345       | 1601     | 2946       |
| <b>D2</b> | 0.1       | -1.29 (59)                   | 0.035     | 0.012  | 0.021  | 0          | 1        | 1          |
|           | 1         | -4.05 (94)                   | -0.010    | -0.004 | -0.009 | 0          | 1        | 1          |
|           | 10        | -4.63 (96)                   | -0.005    | -0.002 | 0.007  | 110        | 118      | 228        |
|           | 50        | -4.28 (95)                   | -0.029    | 0.004  | -0.001 | 342        | 368      | 710        |
| <b>D3</b> | 0.1       | -2.30 (80)                   | 0.007     | 0.005  | 0.023  | 0          | 1        | 1          |
|           | 1         | -4.05 (94)                   | 0.030     | 0.002  | 0.008  | 22         | 24       | 46         |
|           | 10        | -5.38 (98)                   | -0.042    | -0.012 | 0.035  | 1000       | 1104     | 2104       |
|           | 50        | -5.39 (98)                   | -0.047    | -0.038 | 0.045  | 1321       | 1668     | 2989       |
| <b>D4</b> | 0.1       | -7.32 (99)                   | -0.033    | 0.010  | 0.007  | 0          | 0        | 0          |
|           | 1         | -7.95 (100)                  | -0.099    | -0.029 | -0.016 | 98         | 115      | 213        |
|           | 10        | -8.79 (100)                  | -0.353    | -0.184 | -0.134 | 1600       | 1854     | 3454       |
|           | 50        | -9.09 (100)                  | -0.342    | -0.168 | -0.119 | 1809       | 2006     | 3815       |
| <b>D5</b> | 0.1       | -5.03 (97)                   | -0.024    | 0.021  | 0.007  | 0          | 0        | 0          |
|           | 1         | -8.45 (100)                  | -0.050    | -0.002 | -0.009 | 1          | 2        | 3          |
|           | 10        | -7.95 (10)                   | -0.086    | -0.015 | -0.036 | 549        | 359      | 908        |
|           | 50        | -9.38 (100)                  | -0.072    | 0.004  | -0.018 | 550        | 259      | 809        |
| <b>D6</b> | 0.1       | -7.36 (99)                   | -0.051    | 0.006  | -0.012 | 0          | 0        | 0          |
|           | 1         | -8.71 (100)                  | -0.110    | -0.025 | -0.042 | 107        | 130      | 237        |
|           | 10        | -8.95 (100)                  | -0.223    | -0.097 | -0.111 | 1383       | 1509     | 2892       |
|           | 50        | -9.12 (100)                  | -0.261    | -0.126 | -0.138 | 1645       | 1899     | 3544       |

<sup>a</sup>Log<sub>2</sub> fold change relative to mock control.

## Mass Identification of siRNA Metabolites in Mouse Liver

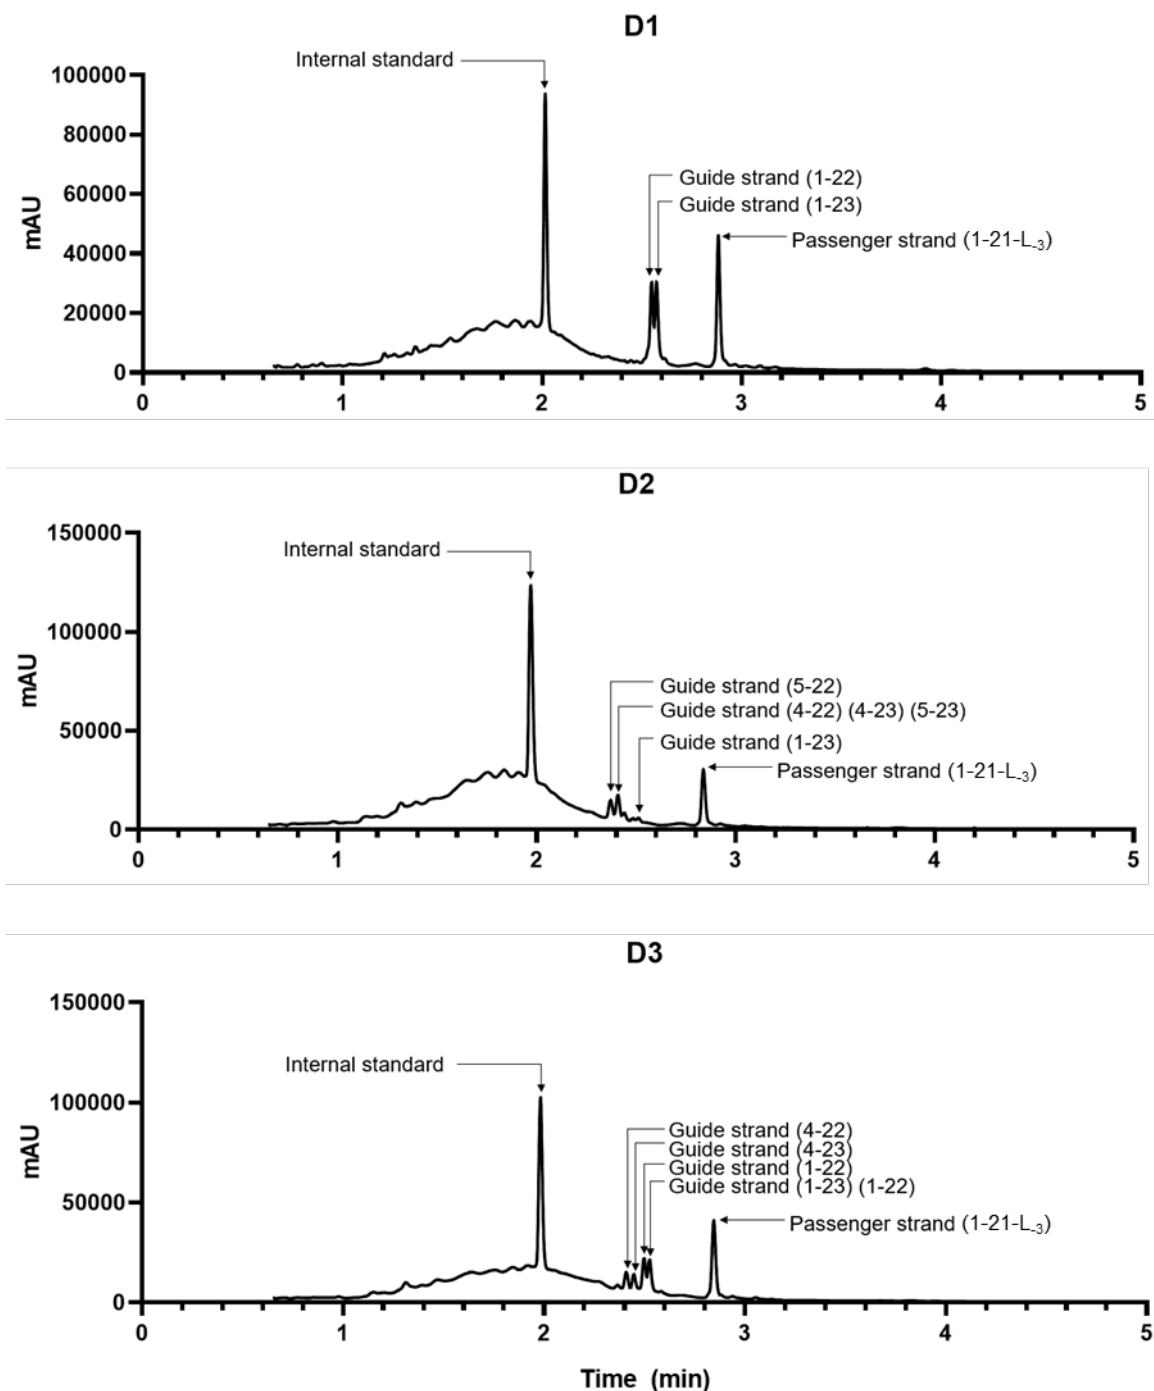

**Figure S7.** Representative UV Chromatograms for *in vivo* mouse MetID with arrows pointing to signal corresponding to observed fragments. See Table S6 and Experimental Section for further details.

**Table S6.** Metabolic Identification from Mouse Liver

| siRNA    | Observed MW                 | Identified Fragment (5' to 3')                                     | Strand                                                           | Nucleotides in Fragment (5' to 3') | % of Total Strand    |
|----------|-----------------------------|--------------------------------------------------------------------|------------------------------------------------------------------|------------------------------------|----------------------|
| D1       | 7932.729                    | <b>g</b> ● <b>a</b> ● <b>a</b> uguGaaAGucaucgacaaL <sub>-3</sub>   | Passenger                                                        | 1-21-L <sub>-3</sub>               | 89                   |
|          | 7054.210                    | <b>g</b> ● <b>a</b> ● <b>a</b> uguGaaAGucaucgacaa                  | Passenger                                                        | 1-21                               | 1                    |
|          | 6368.078                    | <b>g</b> ● <b>a</b> ● <b>a</b> uguGaaAGucaucgac                    | Passenger                                                        | 1-19                               | 4                    |
|          | 5705.948                    | <b>g</b> ● <b>a</b> ● <b>a</b> uguGaaAGucaucg                      | Passenger                                                        | 1-17                               | 1                    |
|          | 5346.883                    | <b>g</b> ● <b>a</b> ● <b>a</b> uguGaaAGucauc                       | Passenger                                                        | 1-16                               | 1                    |
|          | 7557.683                    | <b>a</b> ● <b>a</b> uguGaaAGucaucgacaaL <sub>-3</sub>              | Passenger                                                        | 2-21-L <sub>-3</sub>               | 4                    |
|          | 7534.058                    | u●U● <b>g</b> ucGaUGacuuUcAcauuc●u● <b>g</b>                       | Guide                                                            | 1-23                               | 54                   |
|          | 7159.016                    | u●U● <b>g</b> ucGaUGacuuUcAcauuc●u                                 | Guide                                                            | 1-22                               | 43                   |
|          | 4530.709                    | acuuUcAcauuc●u● <b>g</b>                                           | Guide                                                            | 10-23                              | 1                    |
|          | 4187.639                    | cuuUcAcauuc●u● <b>g</b>                                            | Guide                                                            | 11-23                              | 1                    |
|          | 5819.896                    | cGaUGacuuUcAcauuc●u                                                | Guide                                                            | 5-22                               | 1                    |
|          | 3812.589                    | cuuUcAcauuc●u                                                      | Guide                                                            | 11-22                              | 1                    |
|          | D2                          | 8032.799                                                           | <b>g</b> ● <b>a</b> ● <b>a</b> uguGaaAGucaucgacaaL <sub>-2</sub> | Passenger                          | 1-21-L <sub>-2</sub> |
| 7932.735 |                             | <b>g</b> ● <b>a</b> ● <b>a</b> uguGaaAGucaucgacaaL <sub>-3</sub>   | Passenger                                                        | 1-21-L <sub>-3</sub>               | 96                   |
| 5346.875 |                             | <b>g</b> ● <b>a</b> ● <b>a</b> uguGaaAGucauc                       | Passenger                                                        | 1-16                               | 3                    |
| 7462.048 |                             | u●U● <b>g</b> u <u>C</u> GaUGacuuUcAcauuc●u● <b>g</b>              | Guide                                                            | 1-23                               | 9                    |
| 7087.007 |                             | u●U● <b>g</b> u <u>C</u> GaUGacuuUcAcauuc●u                        | Guide                                                            | 1-22                               | 4                    |
| 6442.961 |                             | u <u>C</u> GaUGacuuUcAcauuc●u● <b>g</b>                            | Guide                                                            | 4-23                               | 16                   |
| 6122.913 |                             | <u>C</u> GaUGacuuUcAcauuc●u● <b>g</b>                              | Guide                                                            | 5-23                               | 31                   |
| 4530.708 |                             | acuuUcAcauuc●u● <b>g</b>                                           | Guide                                                            | 10-23                              | 1                    |
| 6067.919 |                             | u <u>C</u> GaUGacuuUcAcauuc●u                                      | Guide                                                            | 4-22                               | 14                   |
| 5747.861 | <u>C</u> GaUGacuuUcAcauuc●u | Guide                                                              | 5-22                                                             | 26                                 |                      |
| D3       | 8032.779                    | <b>g</b> ● <b>a</b> ● <b>a</b> uguGaaAGucaucgacaaL <sub>-2</sub>   | Passenger                                                        | 1-21-L <sub>-2</sub>               | 1                    |
|          | 7932.727                    | <b>g</b> ● <b>a</b> ● <b>a</b> uguGaaAGucaucgacaaL <sub>-3</sub>   | Passenger                                                        | 1-21-L <sub>-3</sub>               | 95                   |
|          | 7054.202                    | <b>g</b> ● <b>a</b> ● <b>a</b> uguGaaAGucaucgacaa                  | Passenger                                                        | 1-21                               | 1                    |
|          | 5705.941                    | <b>g</b> ● <b>a</b> ● <b>a</b> uguGaaAGucaucg                      | Passenger                                                        | 1-17                               | 1                    |
|          | 5346.878                    | <b>g</b> ● <b>a</b> ● <b>a</b> uguGaaAGucauc                       | Passenger                                                        | 1-16                               | 3                    |
|          | 7462.036                    | u●U● <b>g</b> u <sup>i</sup> <u>C</u> GaUGacuuUcAcauuc●u● <b>g</b> | Guide                                                            | 1-23                               | 25                   |
|          | 7086.995                    | u●U● <b>g</b> u <sup>i</sup> <u>C</u> GaUGacuuUcAcauuc●u           | Guide                                                            | 1-22                               | 43                   |
|          | 6442.956                    | u <sup>i</sup> <u>C</u> GaUGacuuUcAcauuc●u● <b>g</b>               | Guide                                                            | 4-23                               | 21                   |
|          | 6122.915                    | <sup>i</sup> <u>C</u> GaUGacuuUcAcauuc●u● <b>g</b>                 | Guide                                                            | 5-23                               | 1                    |
|          | 6067.916                    | u <sup>i</sup> <u>C</u> GaUGacuuUcAcauuc●u                         | Guide                                                            | 4-22                               | 10                   |
|          | 5747.875                    | <sup>i</sup> <u>C</u> GaUGacuuUcAcauuc●u                           | Guide                                                            | 5-22                               | 1                    |

Italicized uppercase, lower-case, and uppercase bold underlined letters represent 2'-deoxy-2'-F, 2'-OMe, and (S)-GNA modifications, respectively to adenosine, cytosine, guanosine, and uridine. "L" represents the tri-N-acetylgalactosamine ligand, and "L<sub>-2</sub>" or "L<sub>-3</sub>" represent loss of all three sugars and two or three linkers from "L". Structures shown in Figure S8 below. Phosphorothioate linkages are indicated by the "●" symbol. Percent of strand is calculated based on TIC intensity summed for all metabolites of a given strand.

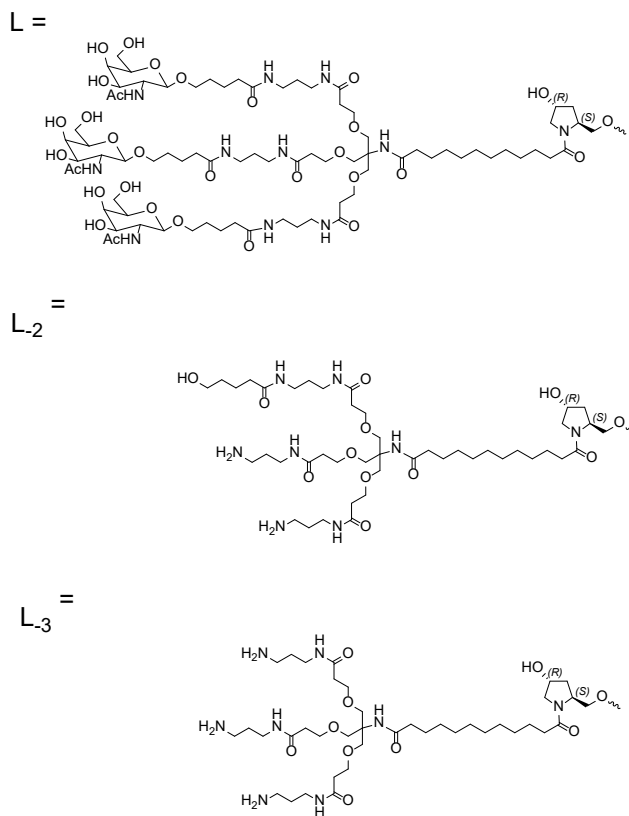

**Figure S8.** Structure of “L”, “L<sub>2</sub>”, and “L<sub>3</sub>”.

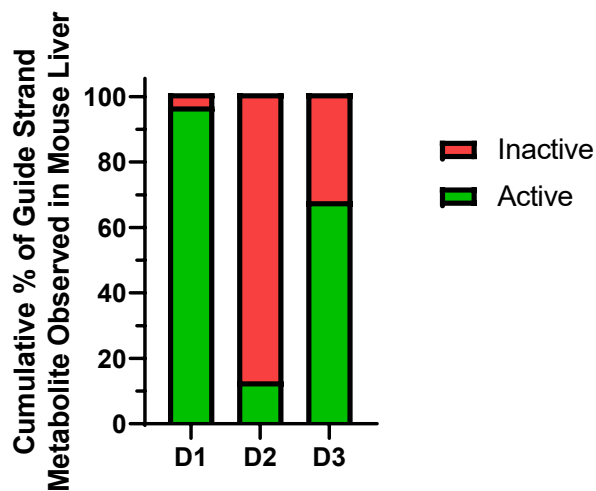

**Figure S9.** Percent of guide strand metabolites observed in mouse liver relative to all metabolites detected in each sample (see Table S6). Active metabolites are defined as the sum of full-length guide strand (nucleotides 1-23) and the 3'-N-1 metabolite (nucleotides 1-22). All other guides strand metabolites in Table S6 are considered unlikely to be active.

<sup>1</sup>H NMR of compound **3** (500 MHz, DMSO-*d*<sub>6</sub>)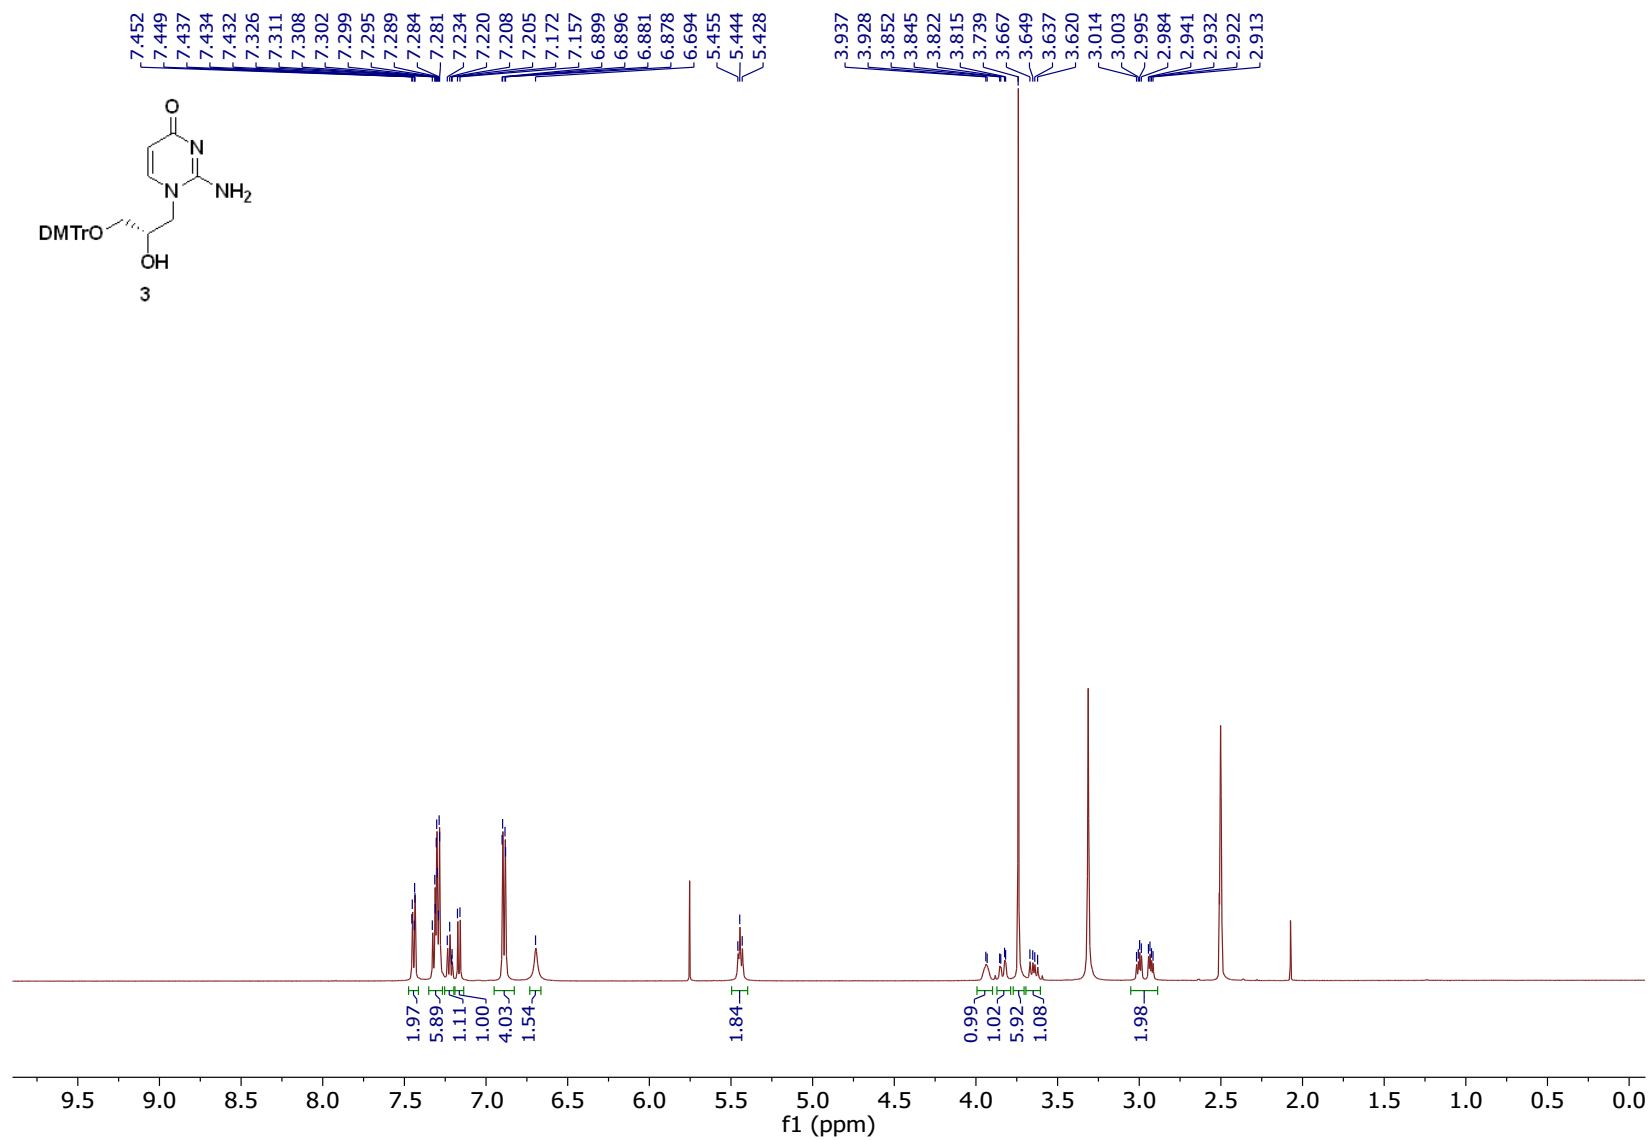



<sup>13</sup>C NMR of compound **3** (126 MHz, DMSO-*d*<sub>6</sub>)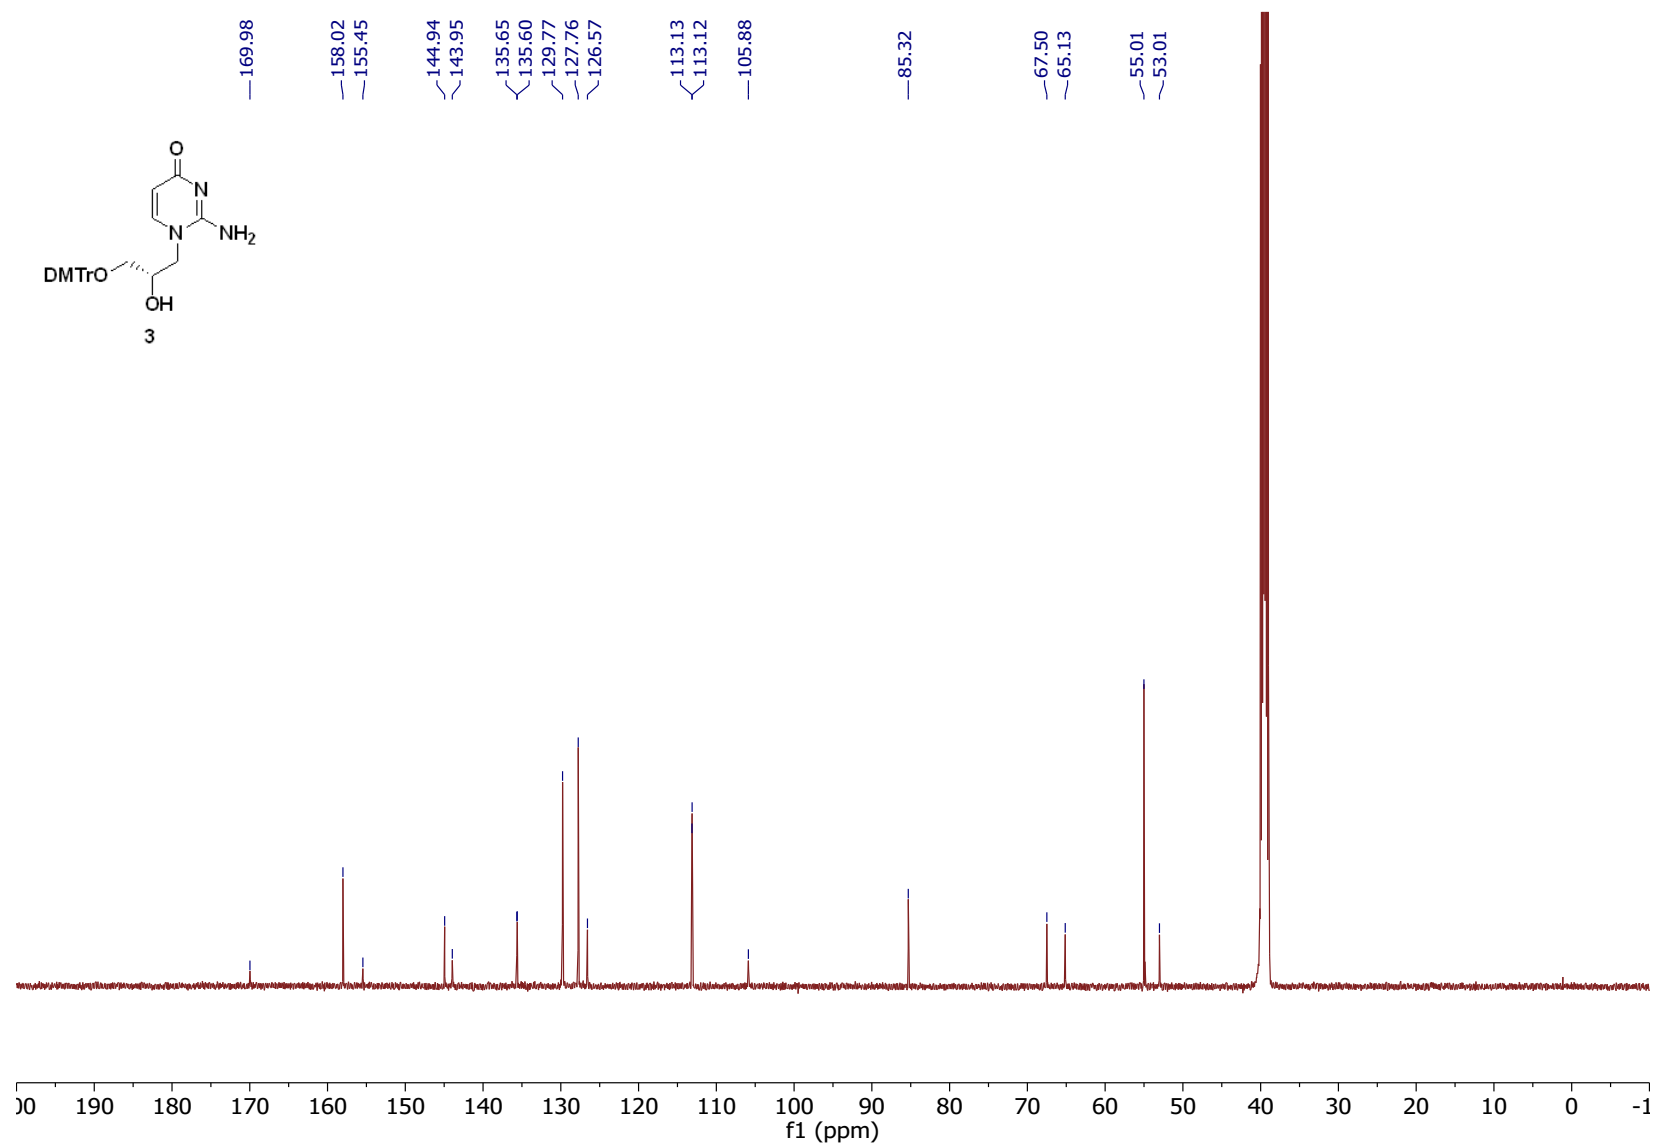

<sup>1</sup>H NMR of compound **4** (400 MHz, DMSO-*d*<sub>6</sub>)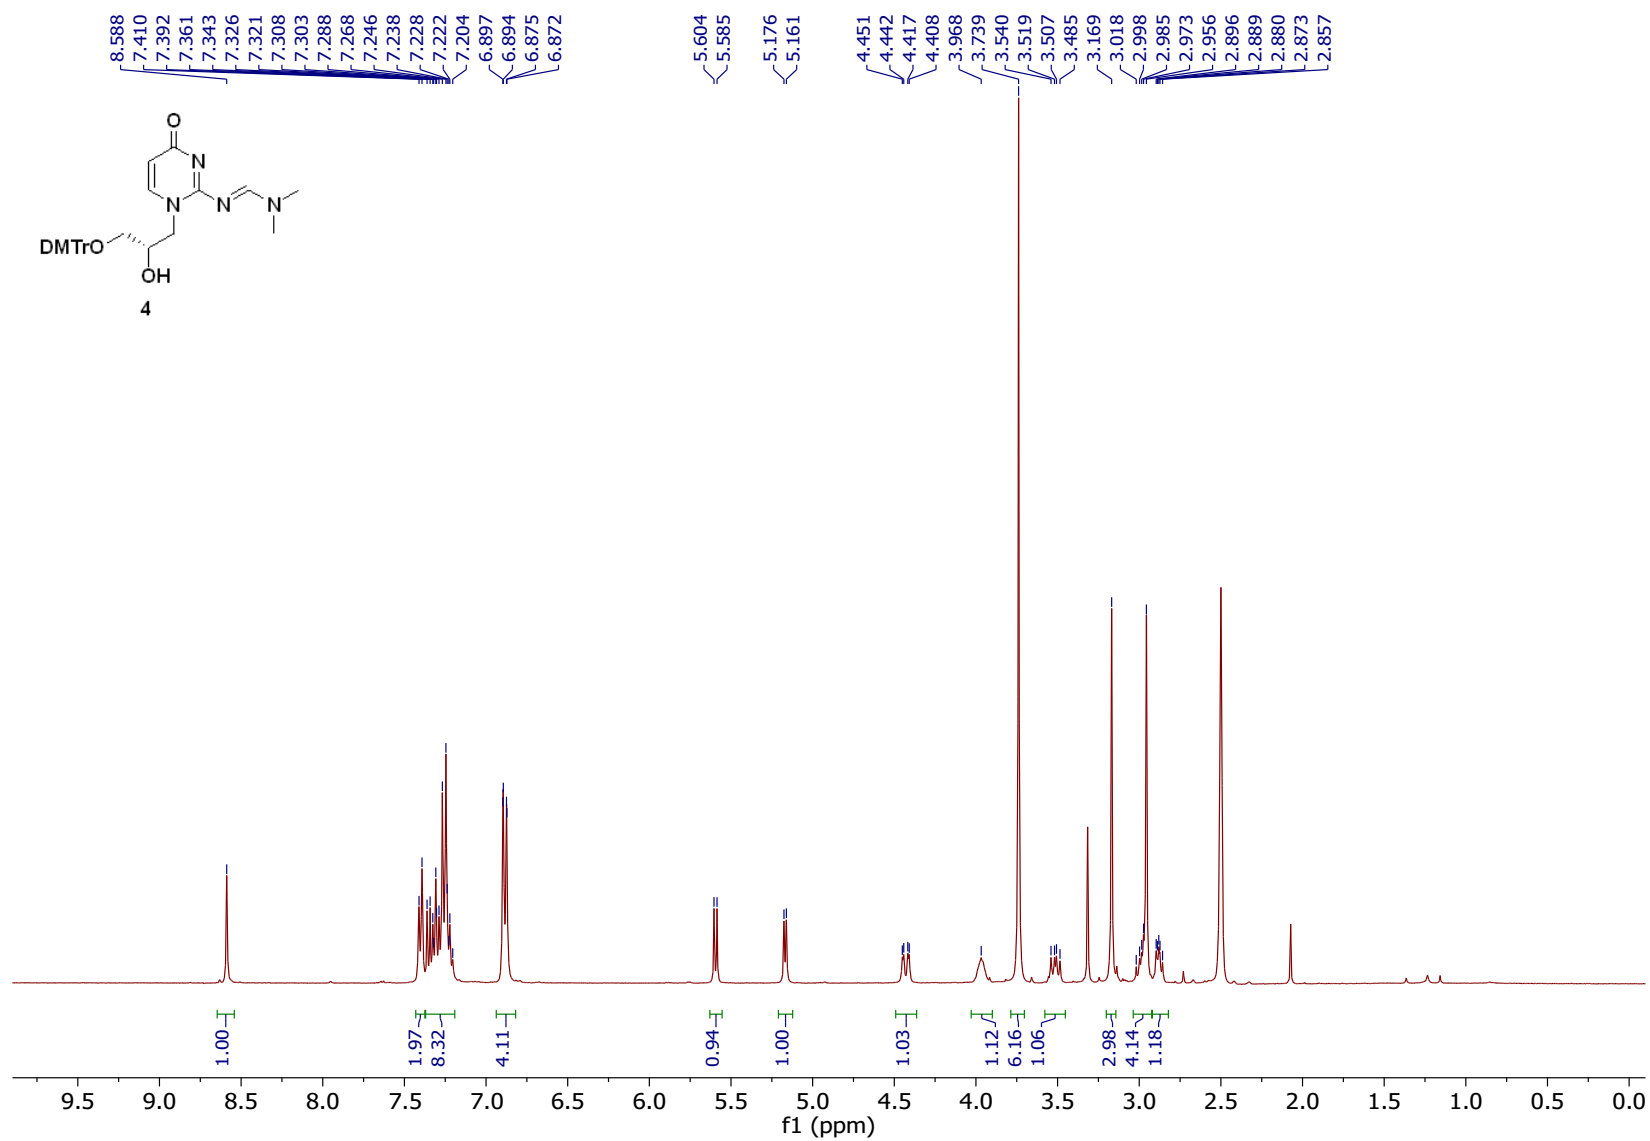

<sup>13</sup>C NMR of compound 4 (126 MHz, DMSO-*d*<sub>6</sub>)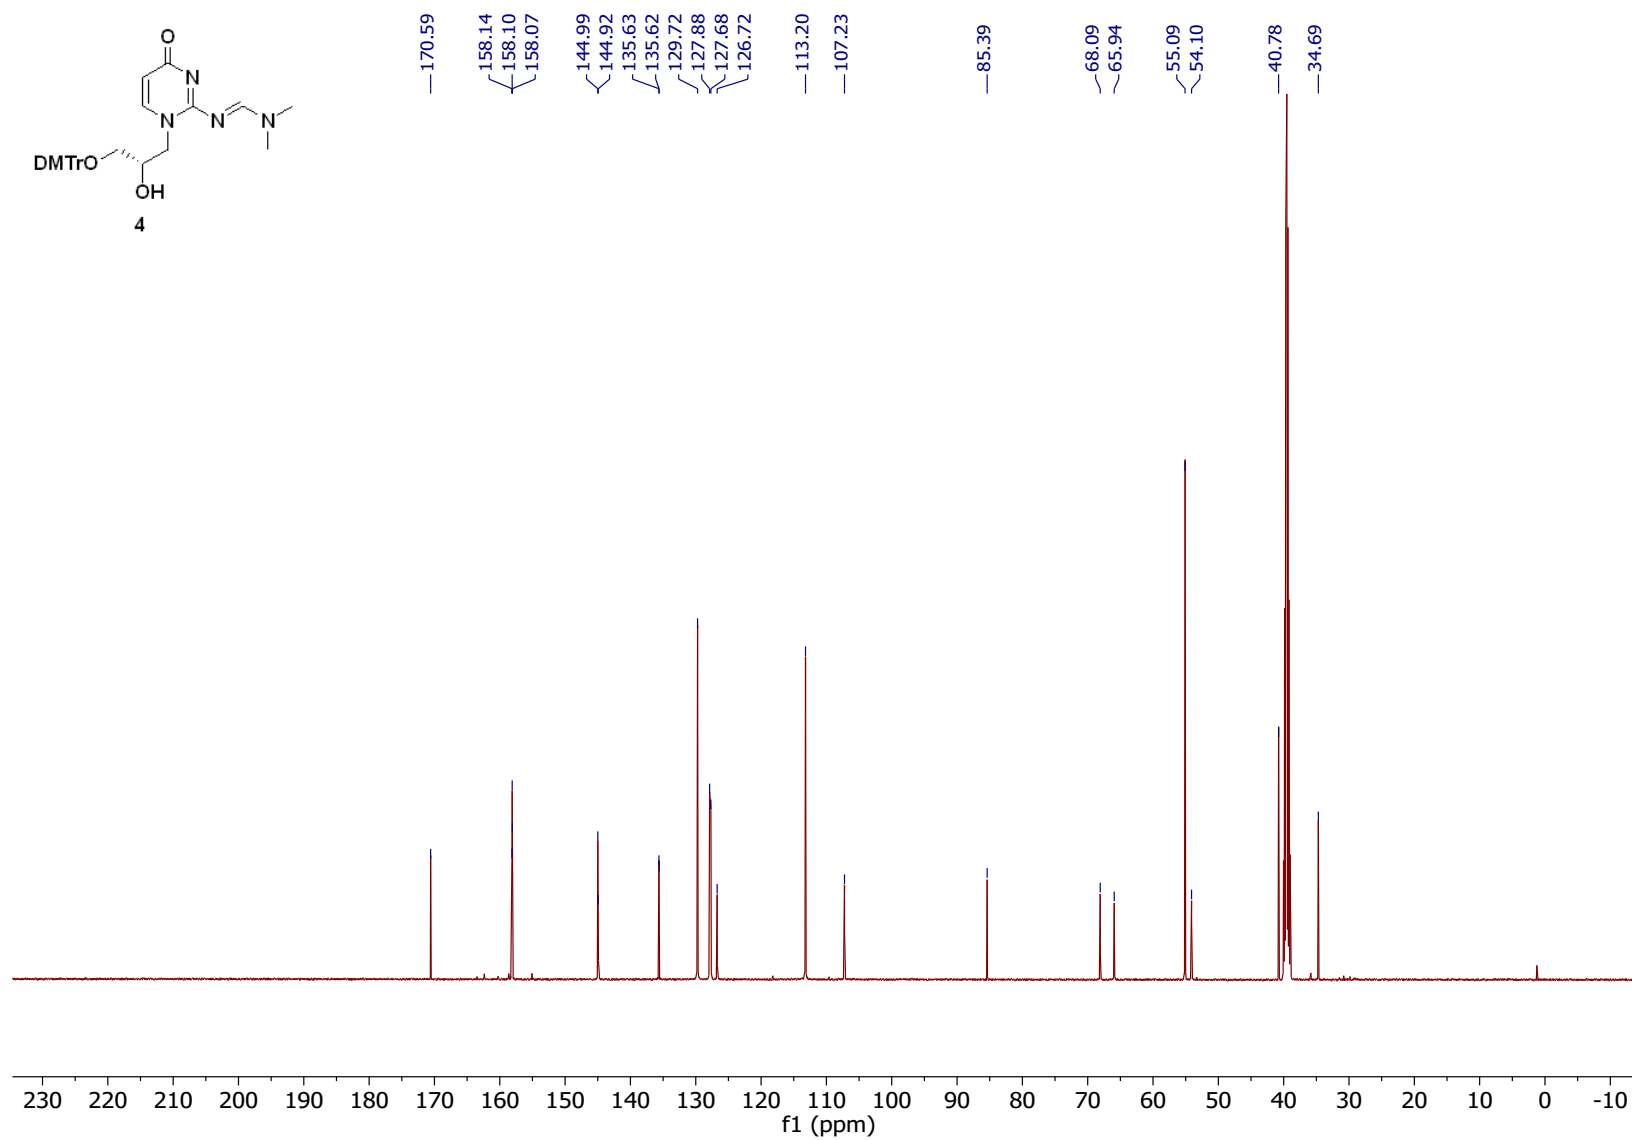

$^1\text{H}$  NMR of phosphoramidite *iC* (500 MHz,  $\text{CD}_3\text{CN}$ )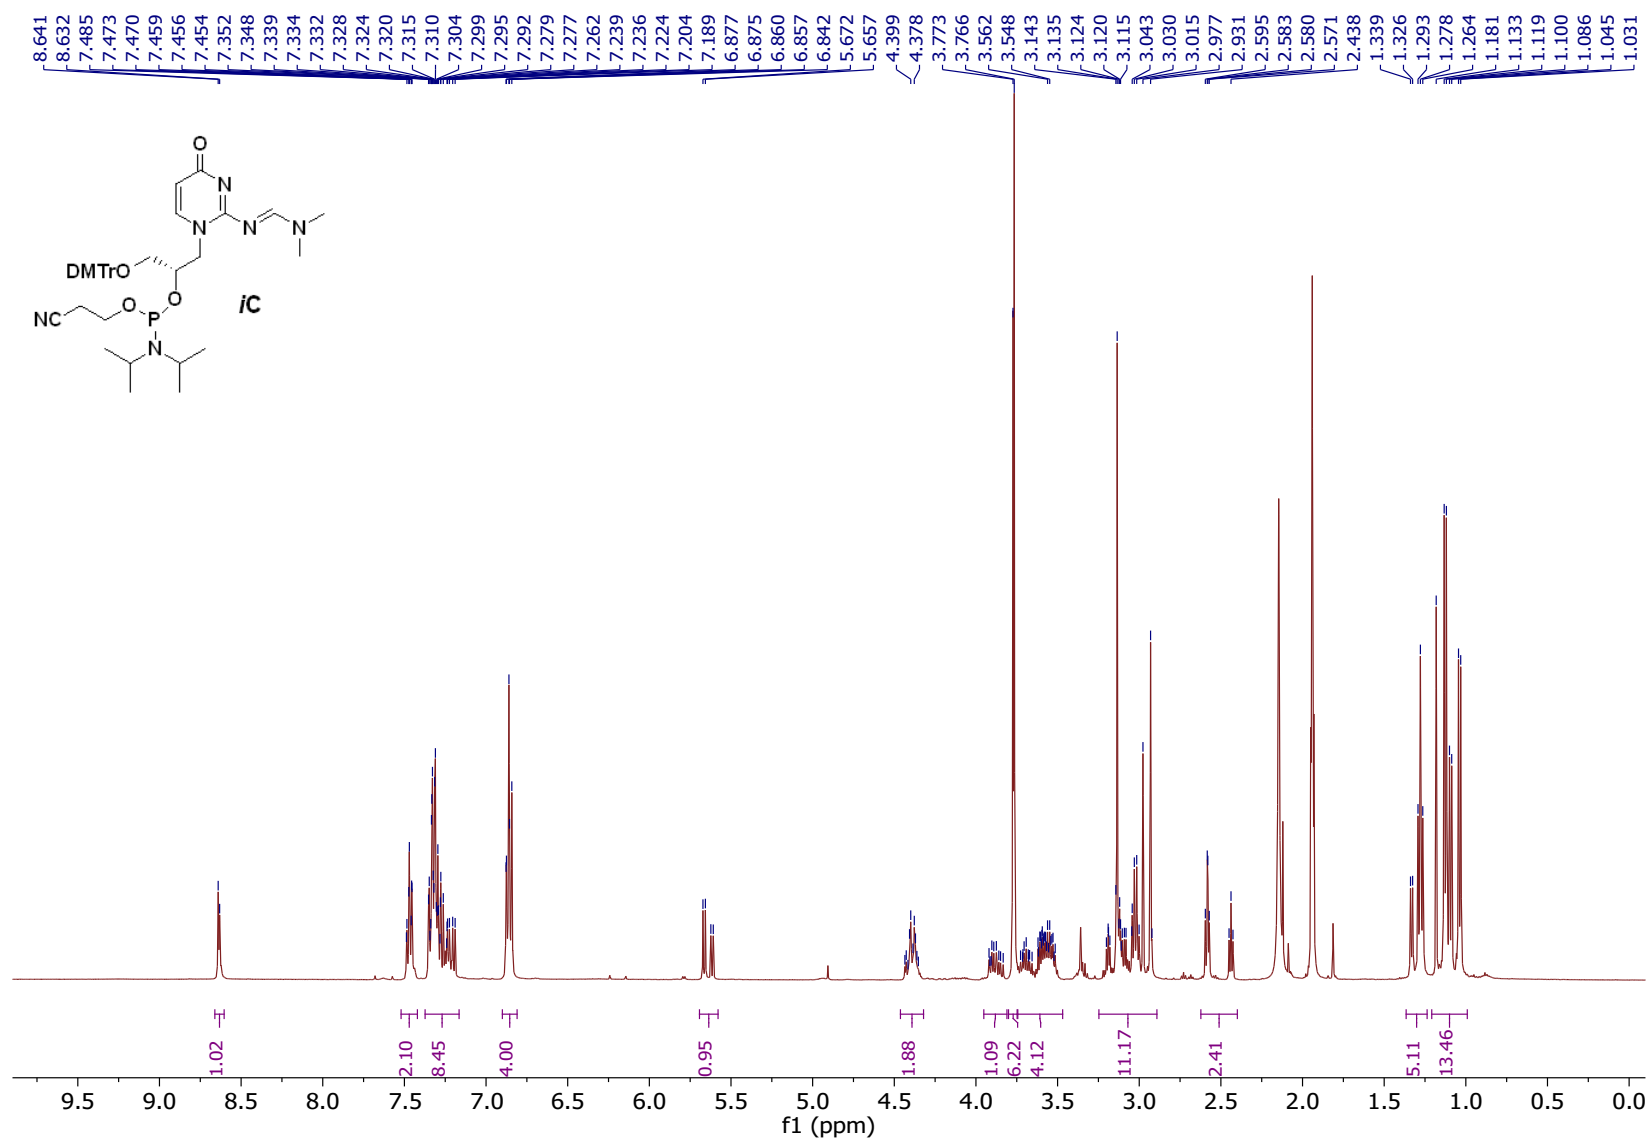

$^{13}\text{C}$  NMR of phosphoramidite **iC** (126 MHz,  $\text{CD}_3\text{CN}$ )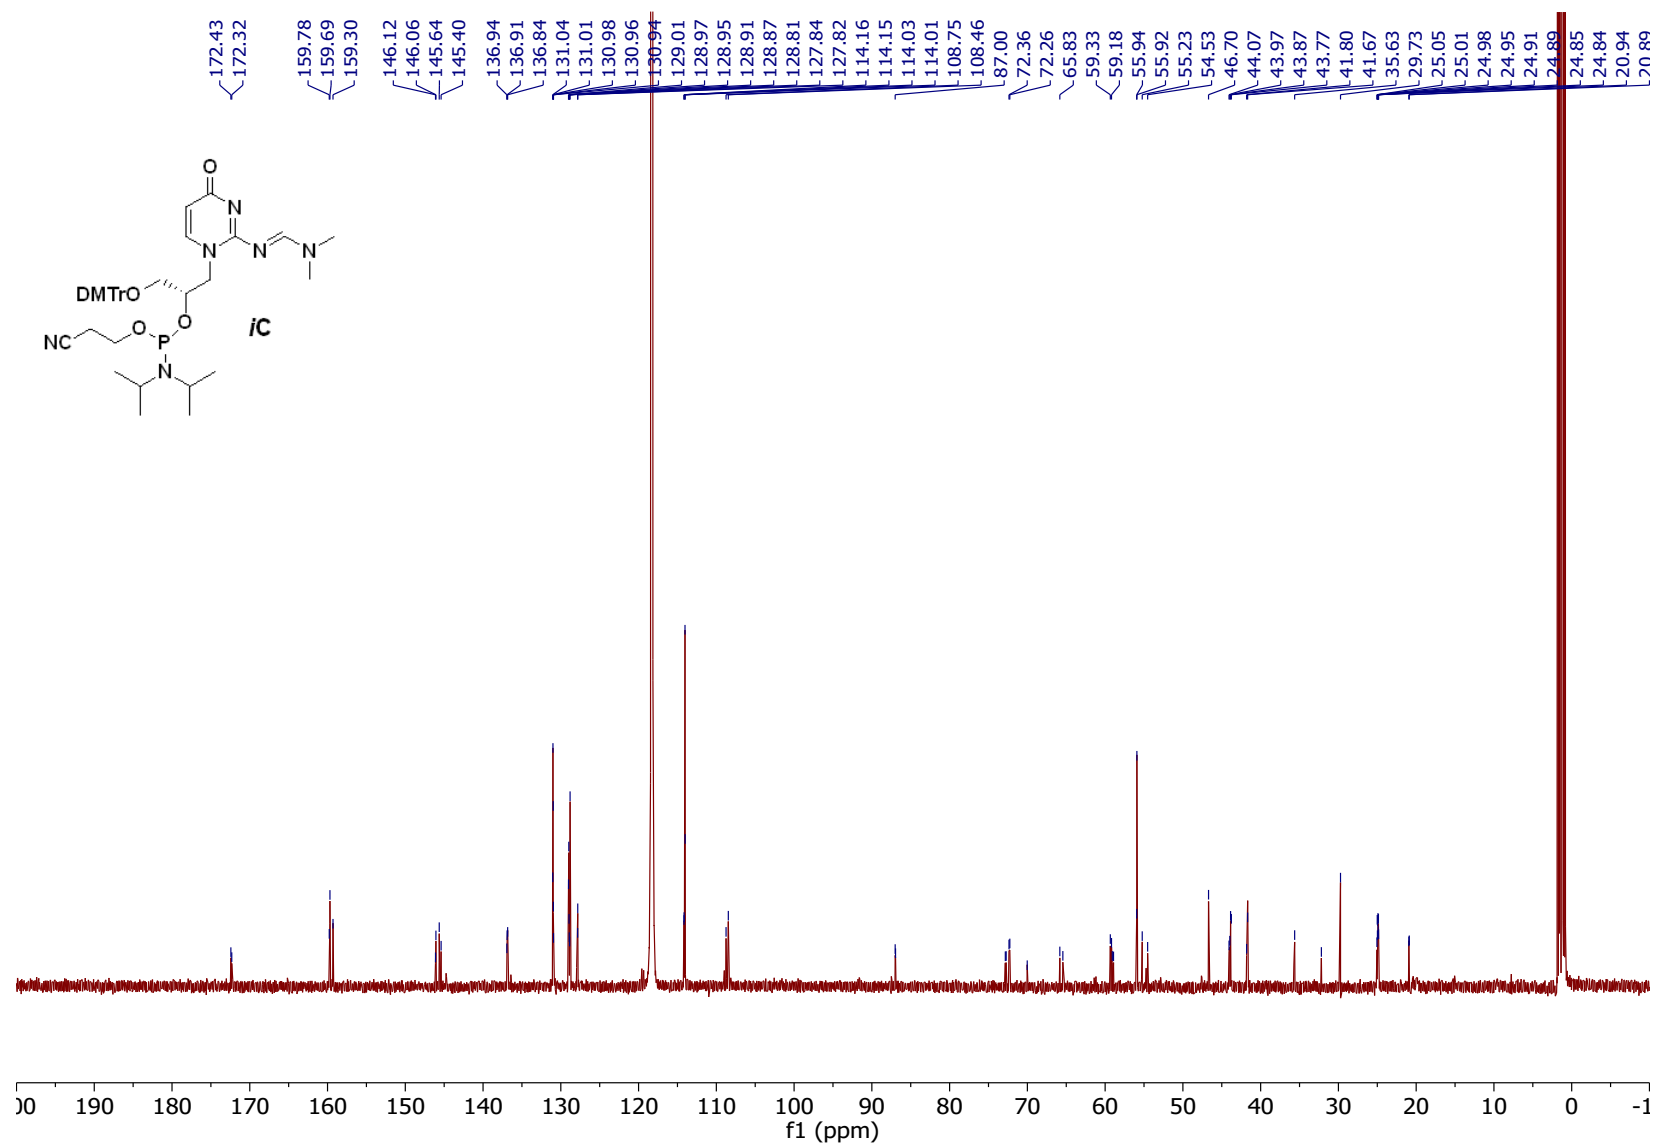

$^{31}\text{P}$  NMR of phosphoramidite **iC** (202 MHz,  $\text{CD}_3\text{CN}$ )

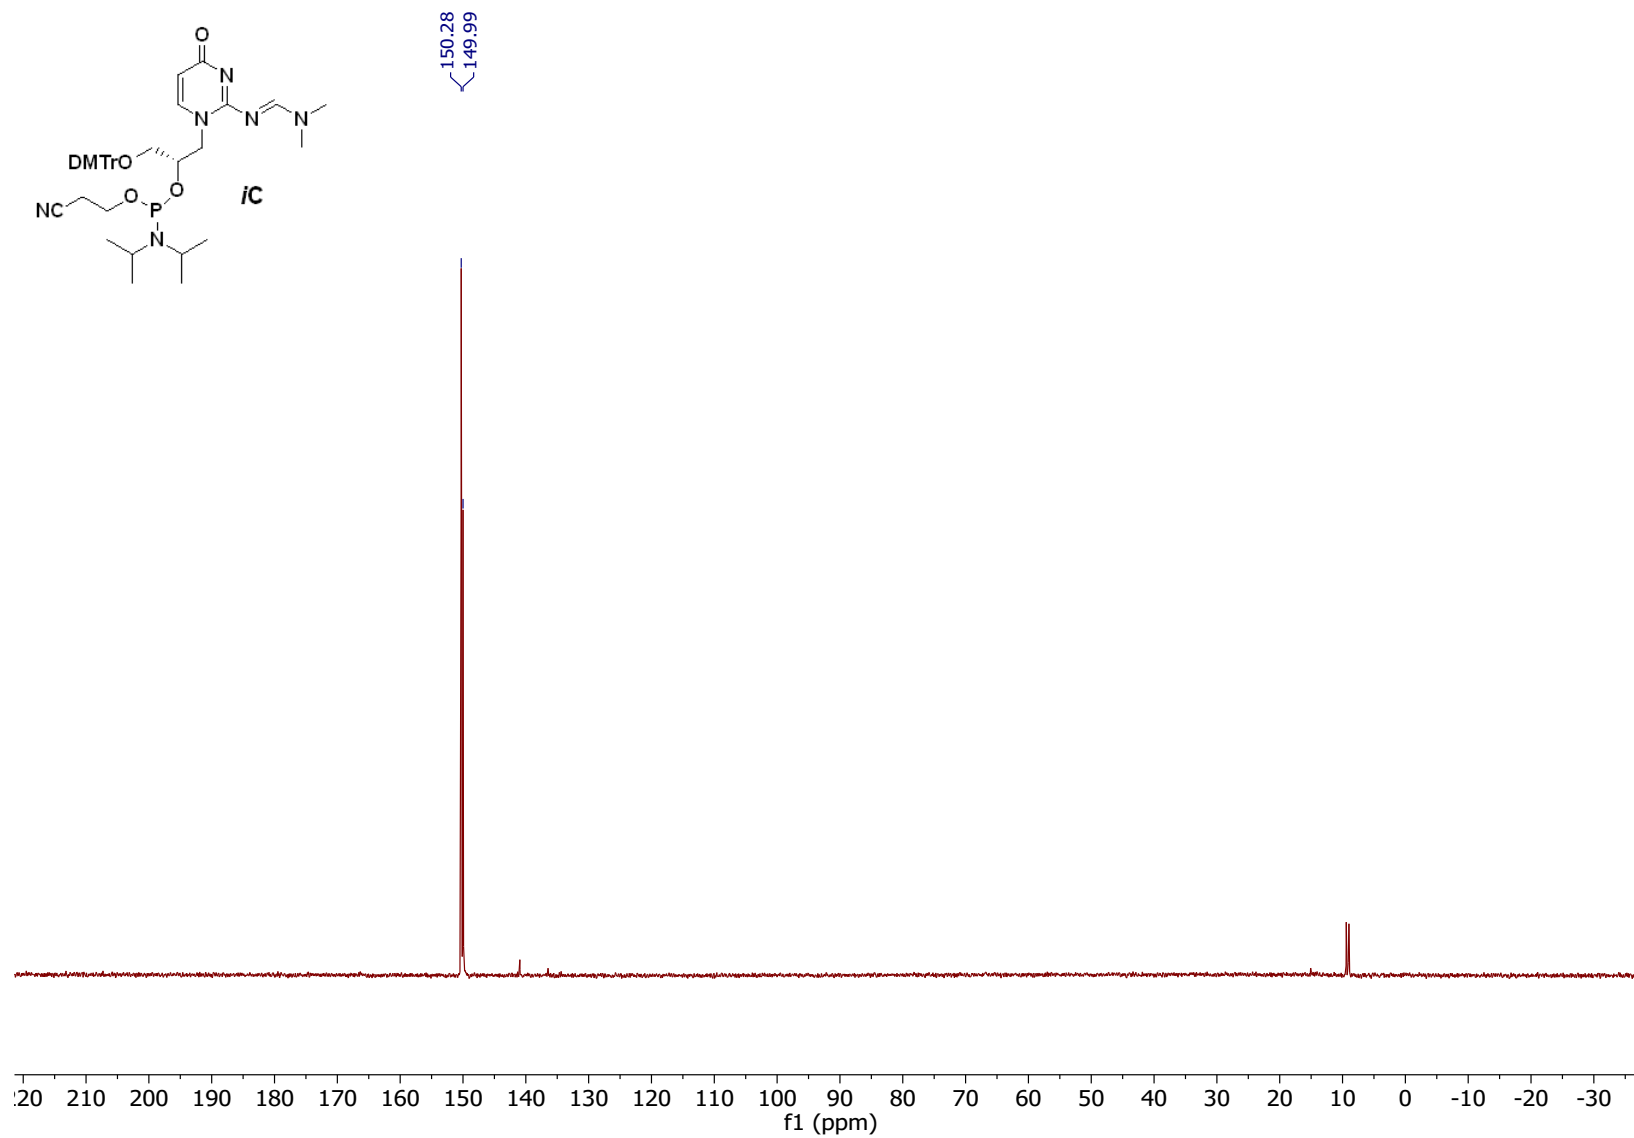

$^1\text{H}$  NMR spectrum of compound **7** (400 MHz,  $\text{CDCl}_3$ )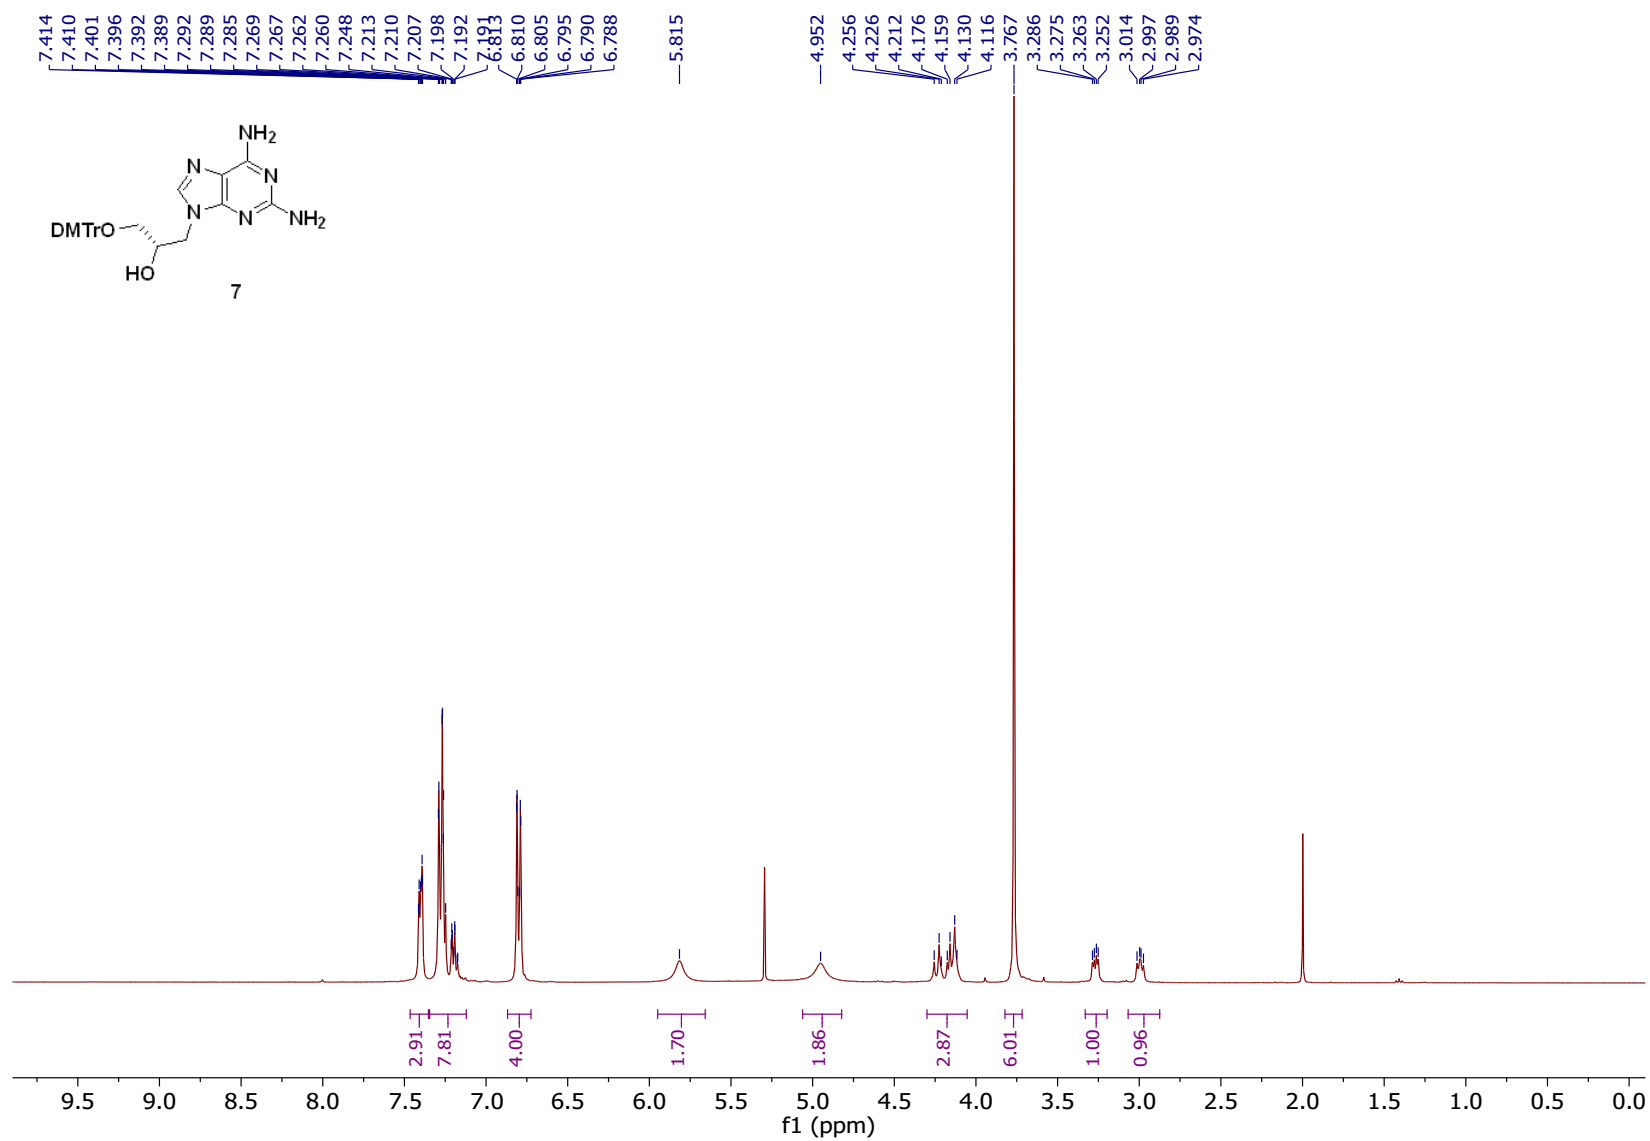

$^{13}\text{C}$  NMR spectrum of compound **7** (101 MHz,  $\text{CDCl}_3$ )

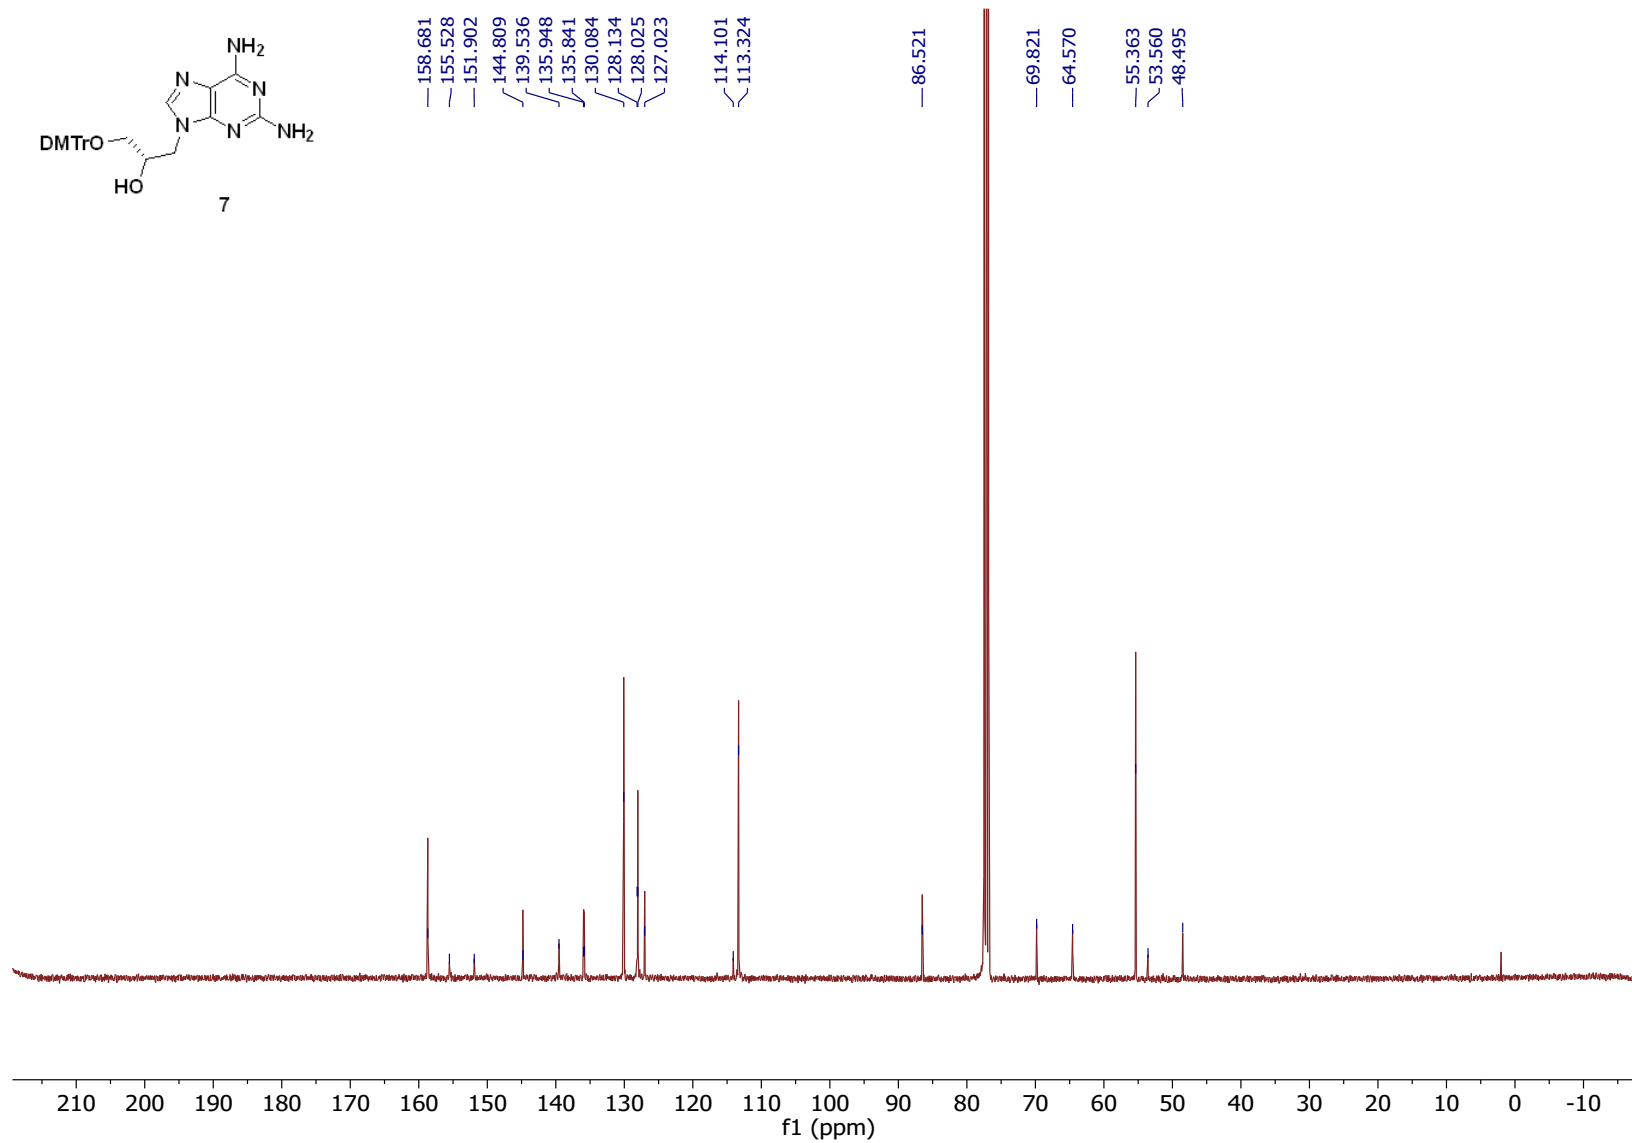



$^1\text{H}$  NMR spectrum of the acetate salt of compound **8** (400 MHz,  $\text{D}_2\text{O}$ )

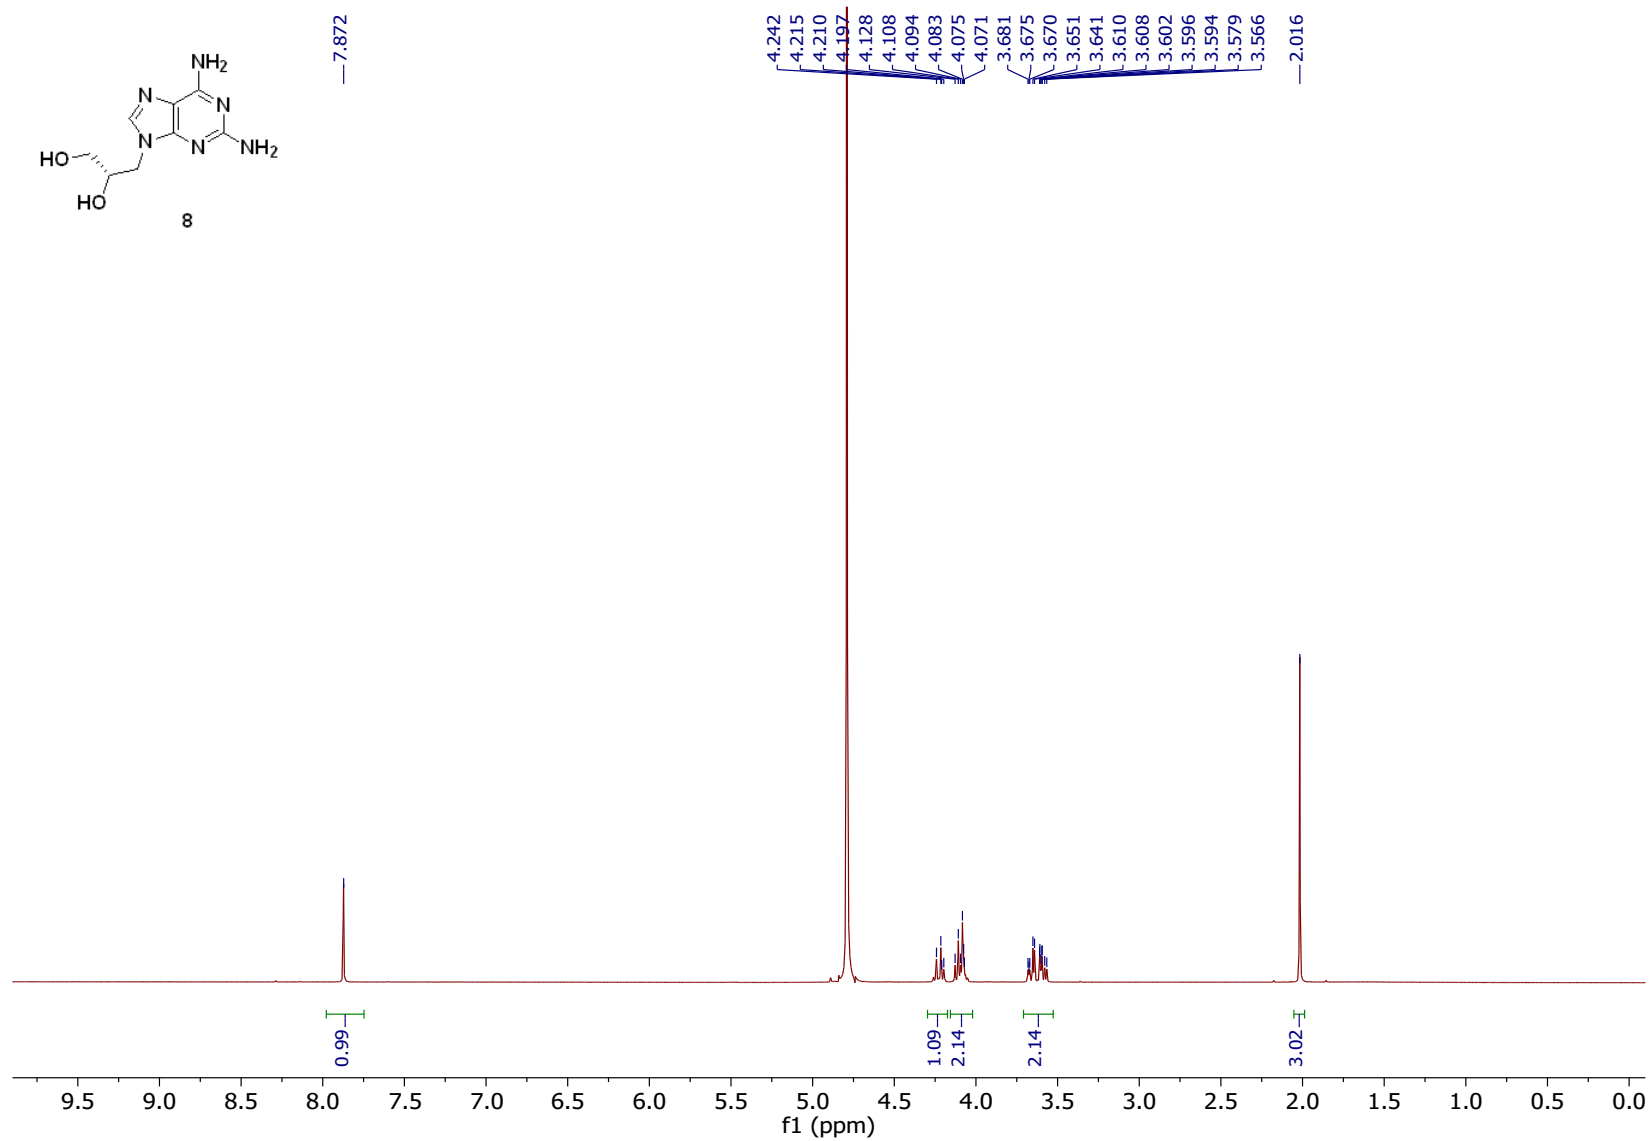

$^{13}\text{C}$  NMR spectrum of the acetate salt of compound **8** (126 MHz,  $\text{D}_2\text{O}$ )

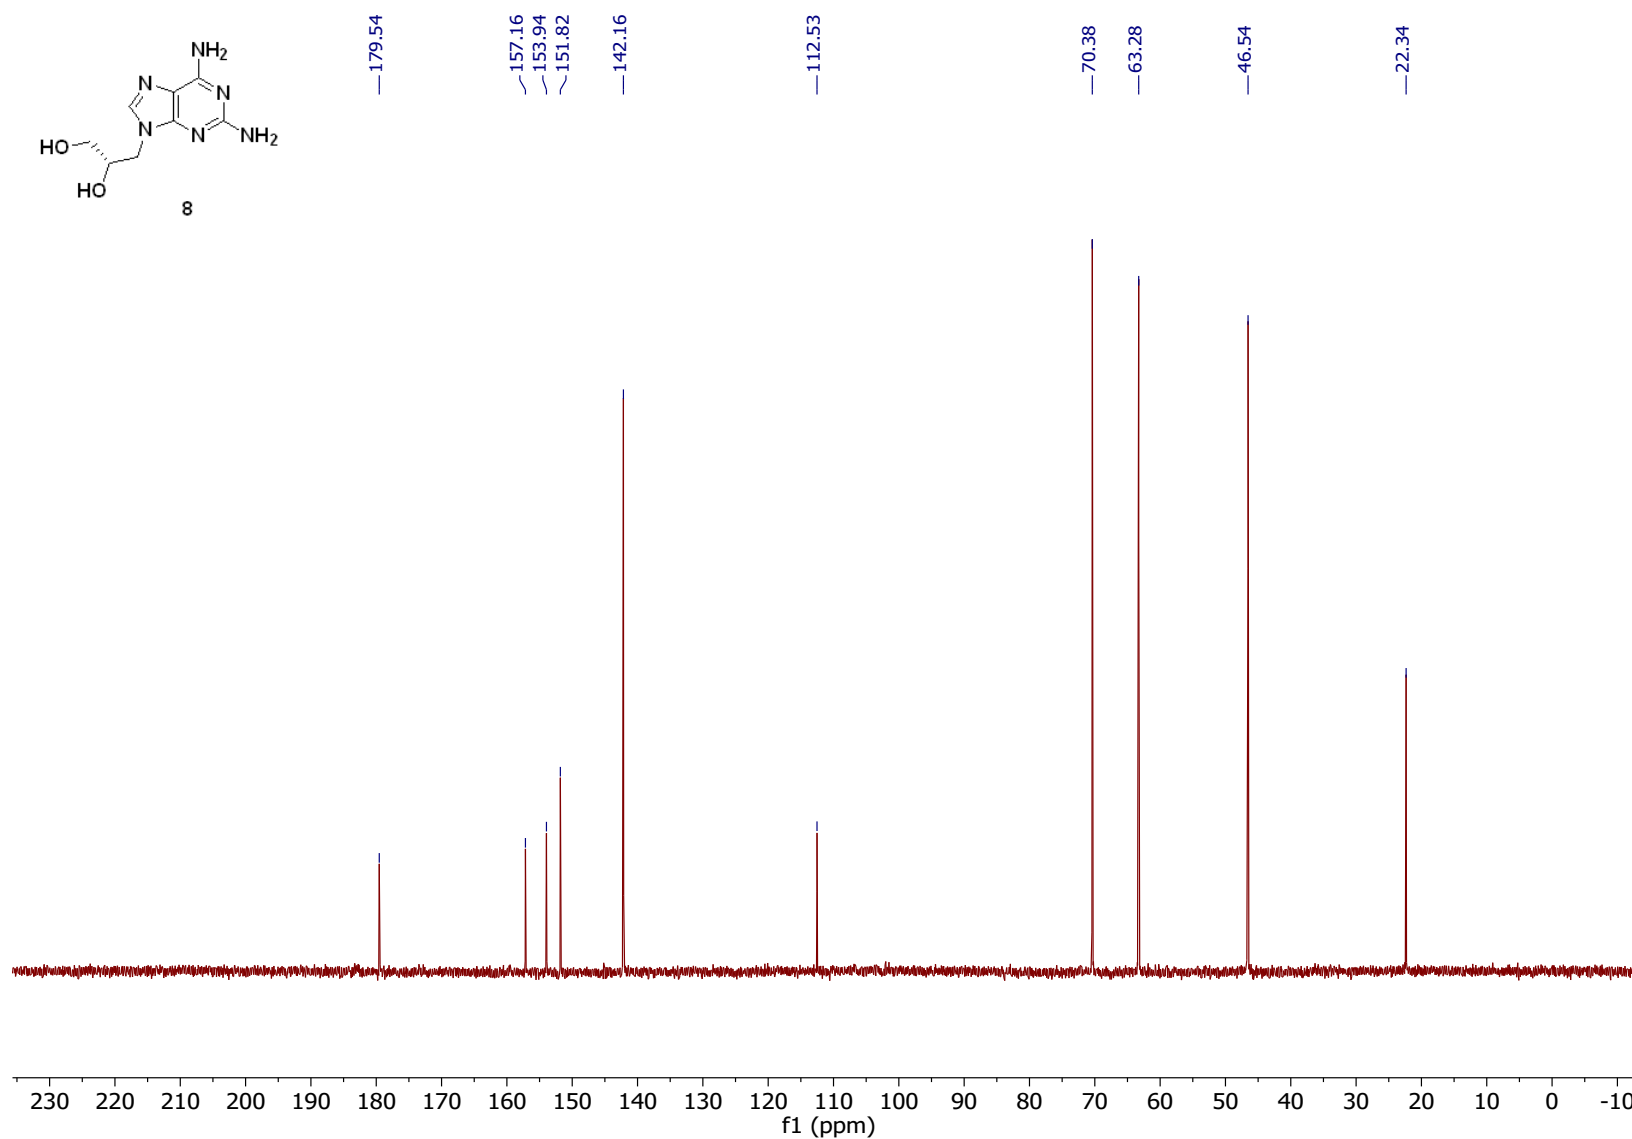

$^1\text{H}$  NMR spectrum of the acetate salt of compound **9** (500 MHz,  $\text{DMSO-}d_6$ )

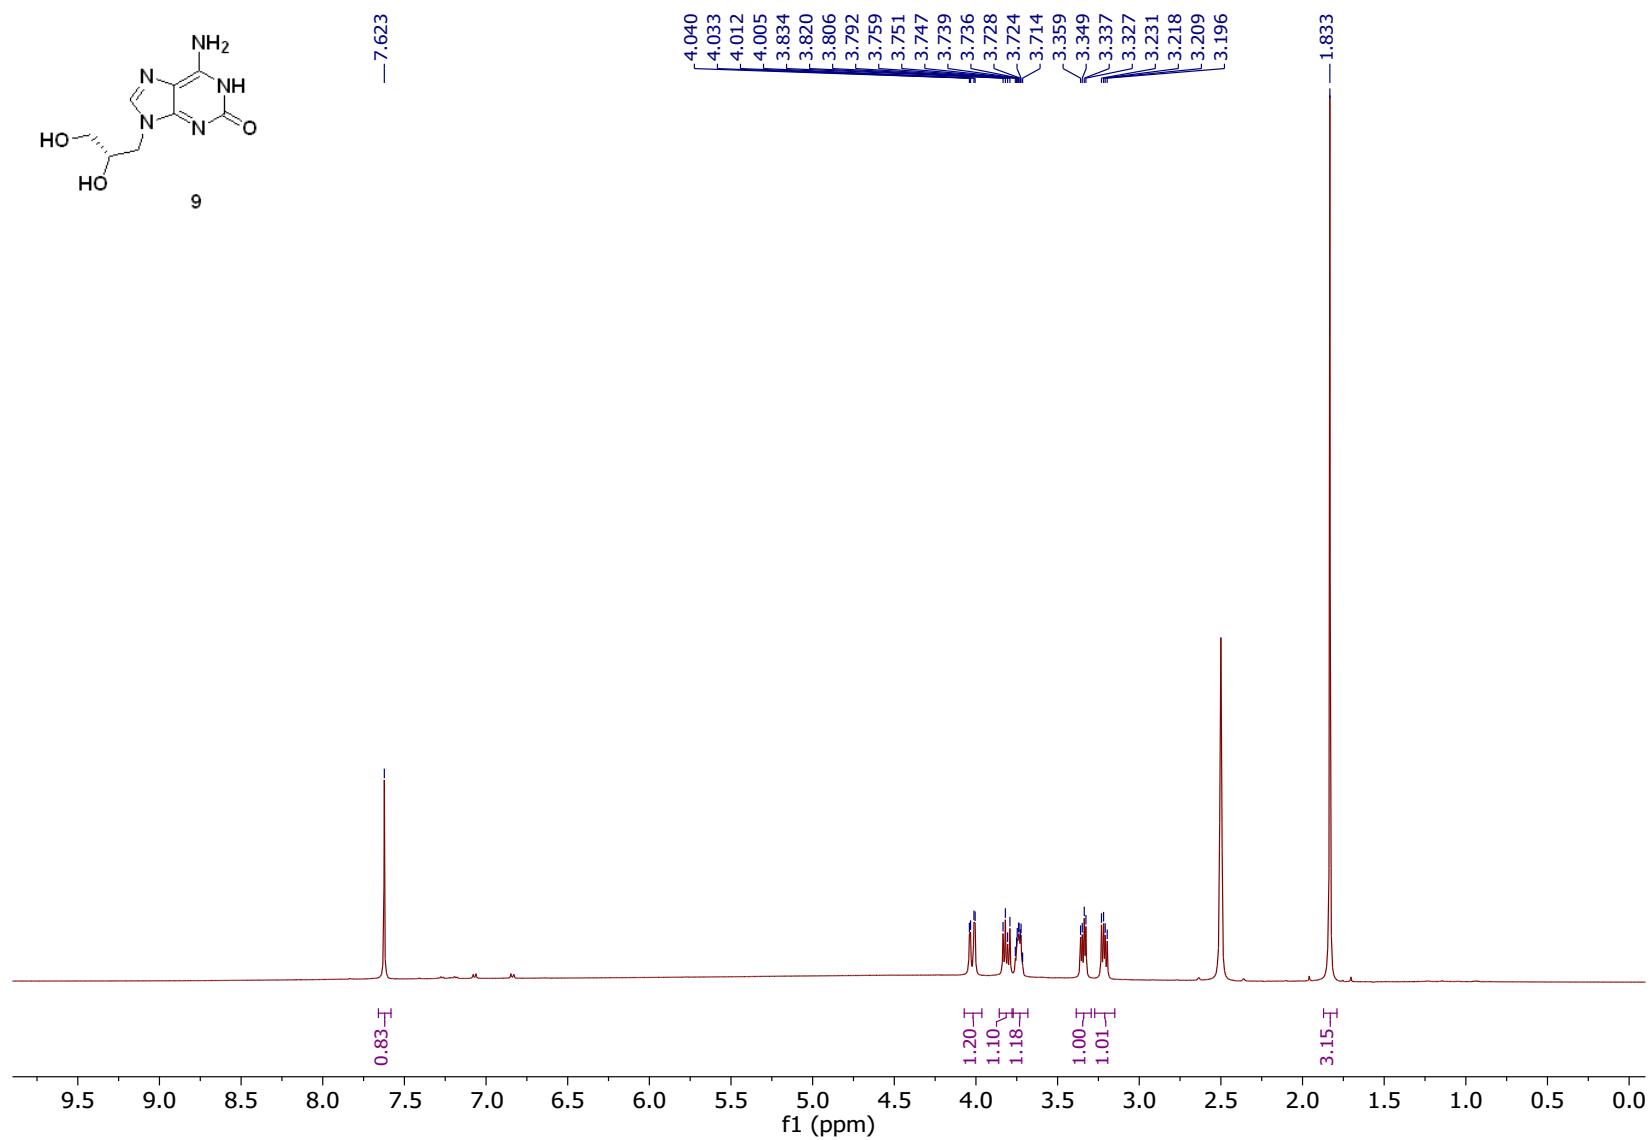

$^{13}\text{C}$  NMR spectrum of the acetate salt of compound **9** (126 MHz,  $\text{DMSO-}d_6$ )

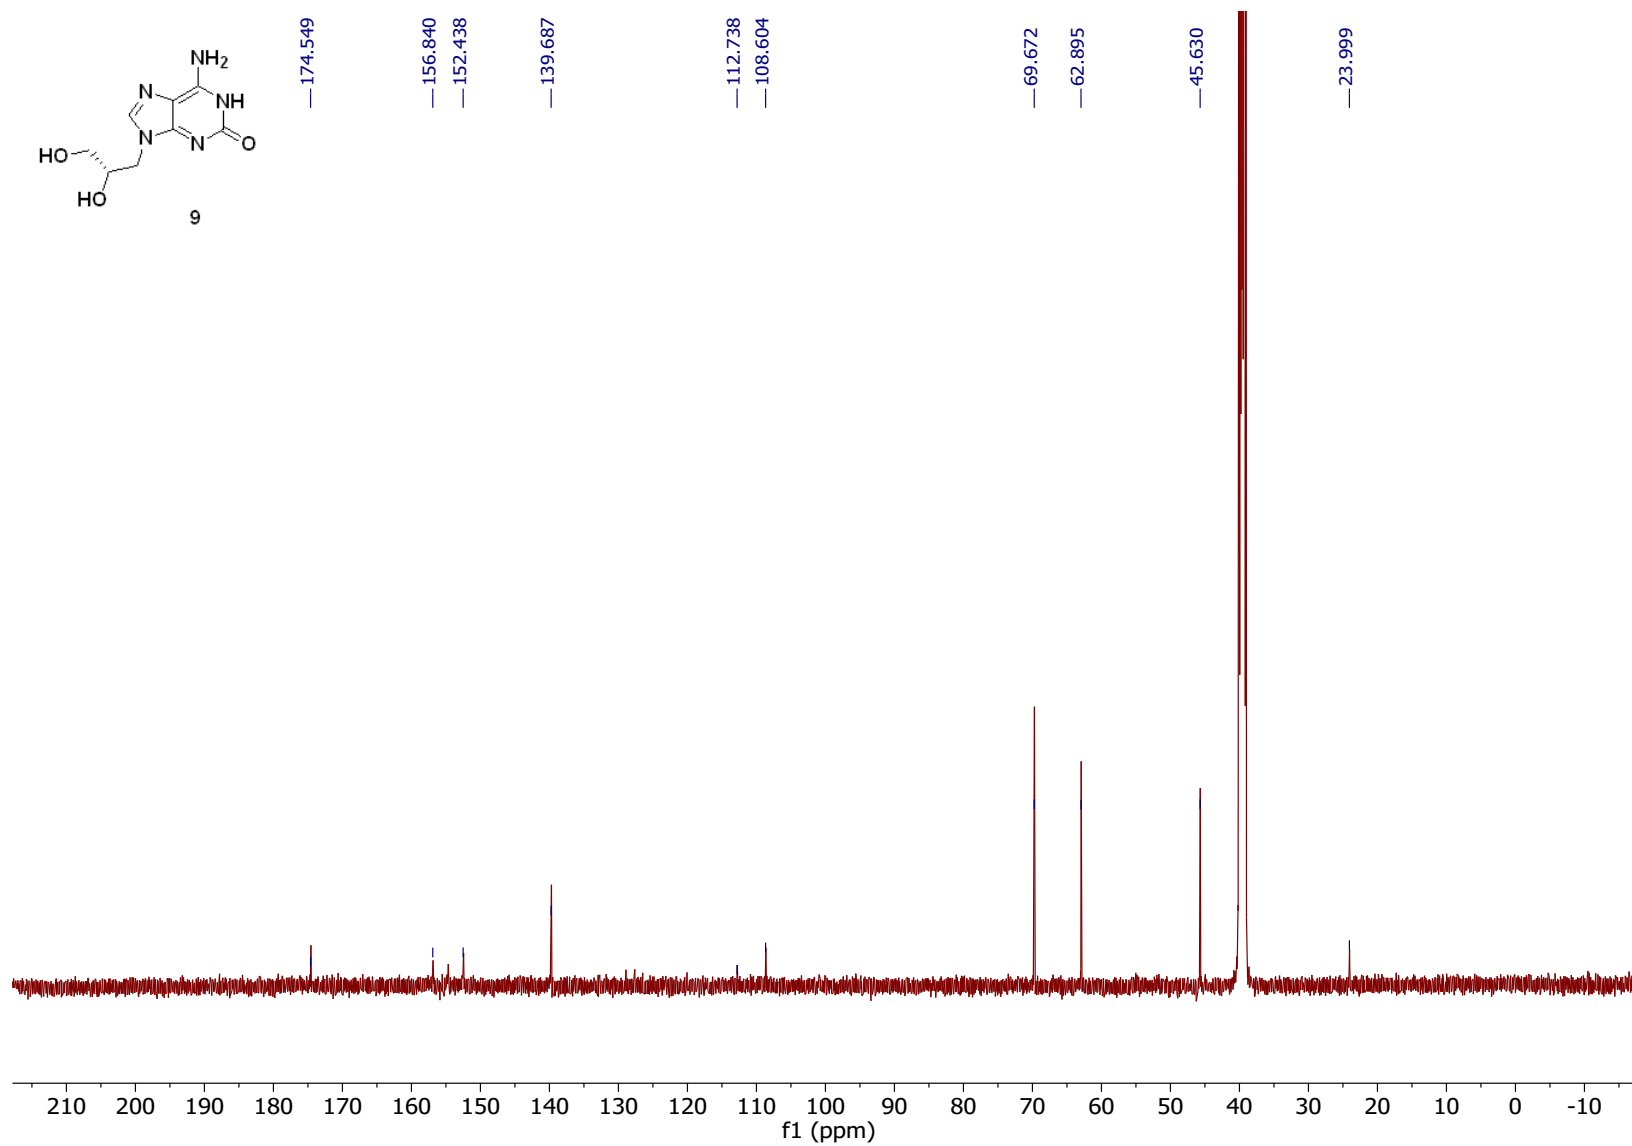

$^1\text{H}$  NMR spectrum of compound **10** (400 MHz,  $\text{DMSO-}d_6$ )

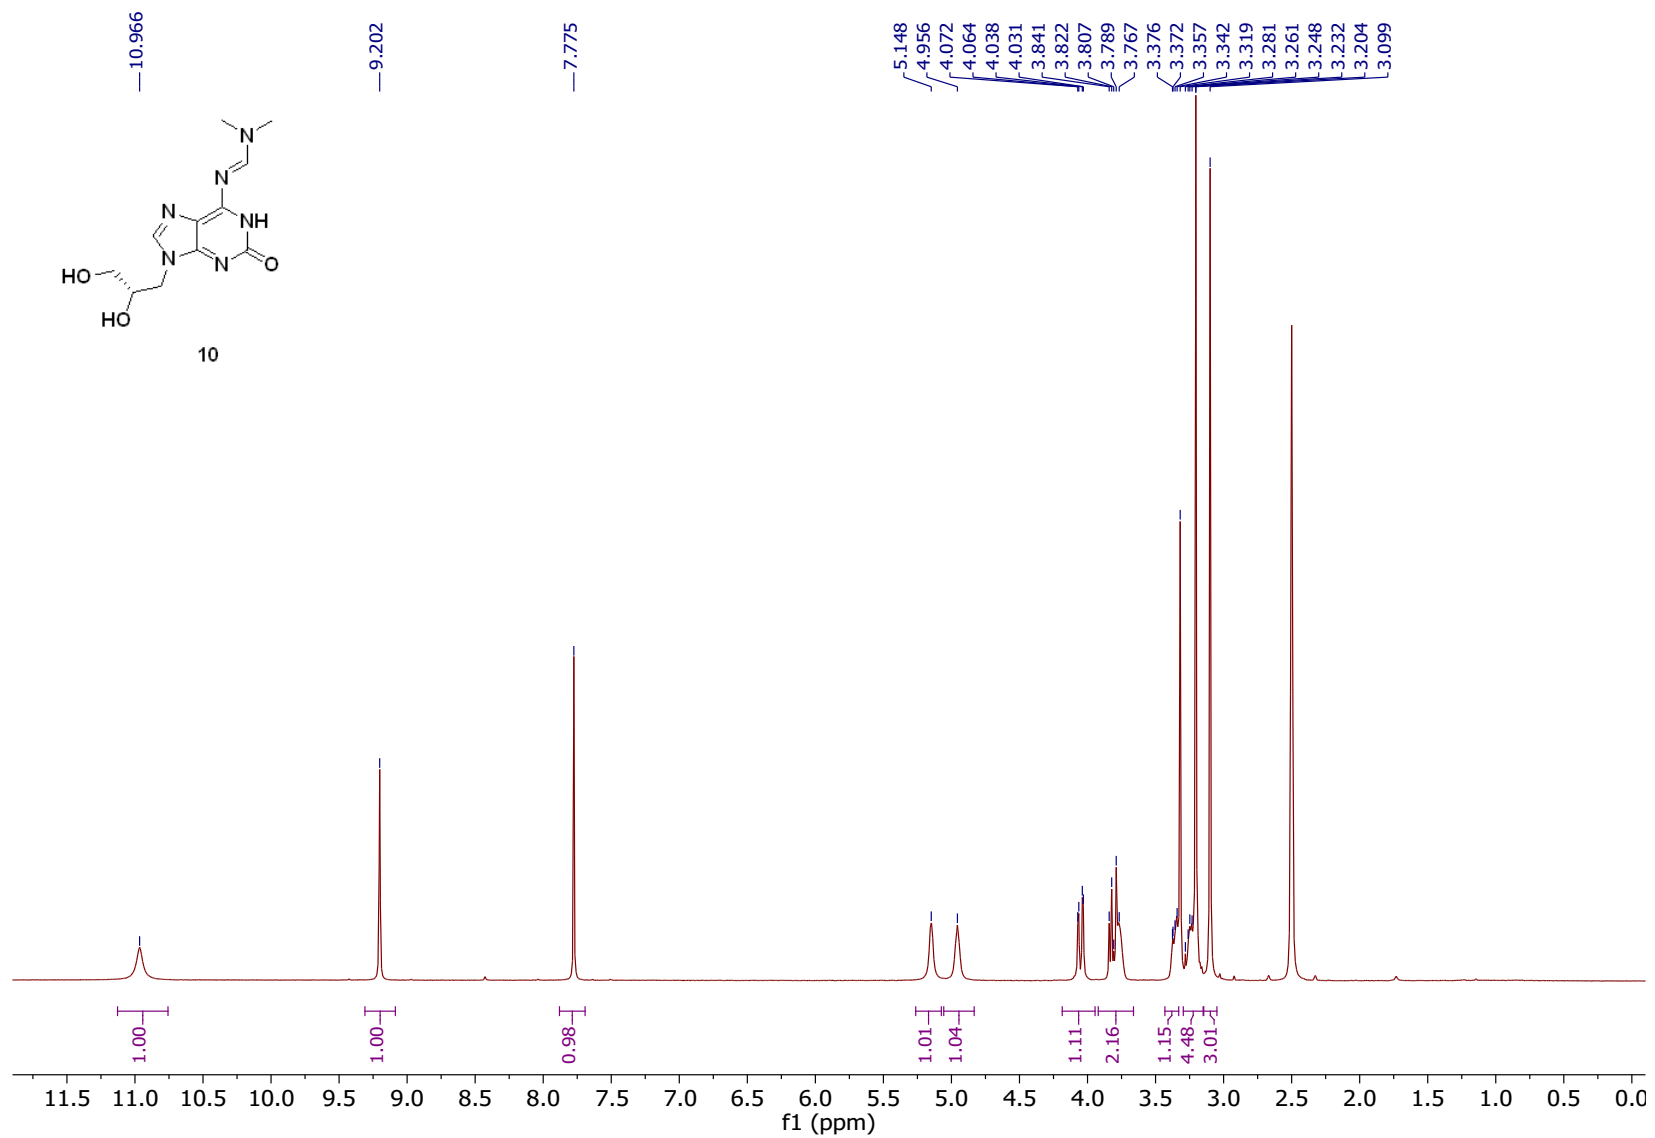

$^{13}\text{C}$  NMR spectrum of compound **10** (126 MHz,  $\text{DMSO-}d_6$ )

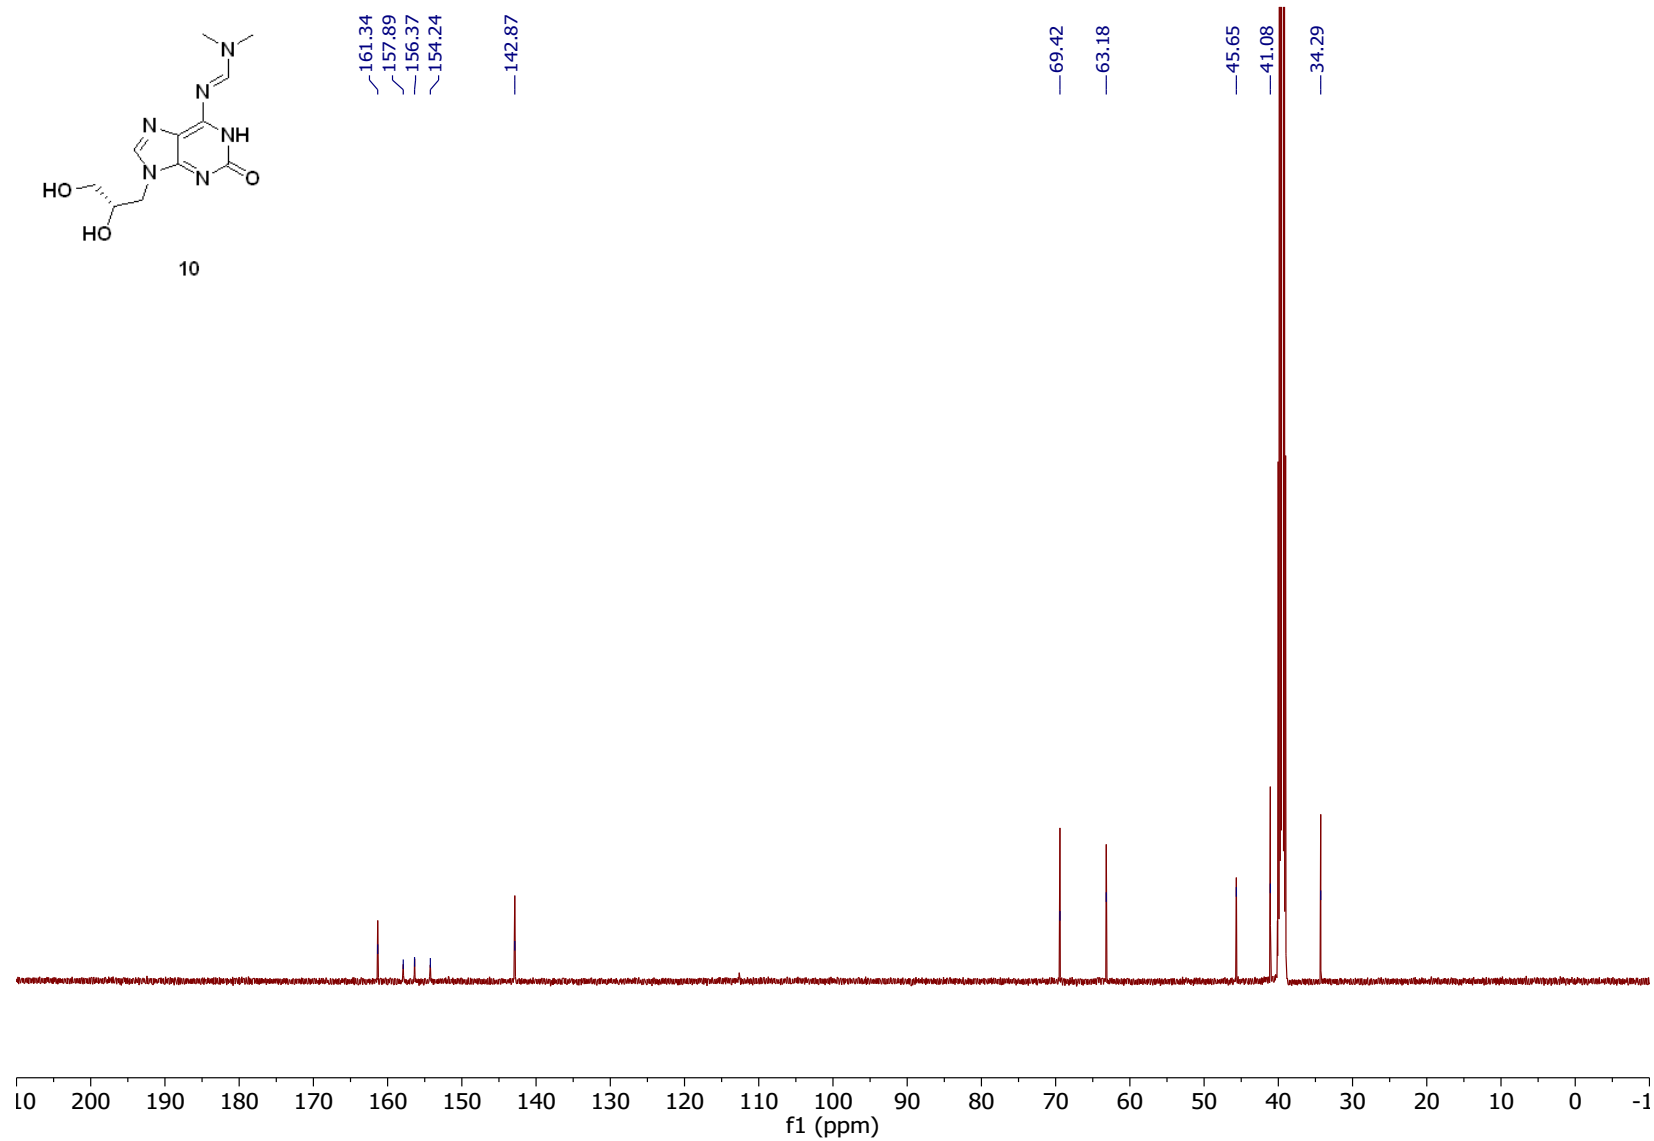

$^1\text{H}$  NMR spectrum of compound **11** (400 MHz,  $\text{DMSO-}d_6$ )

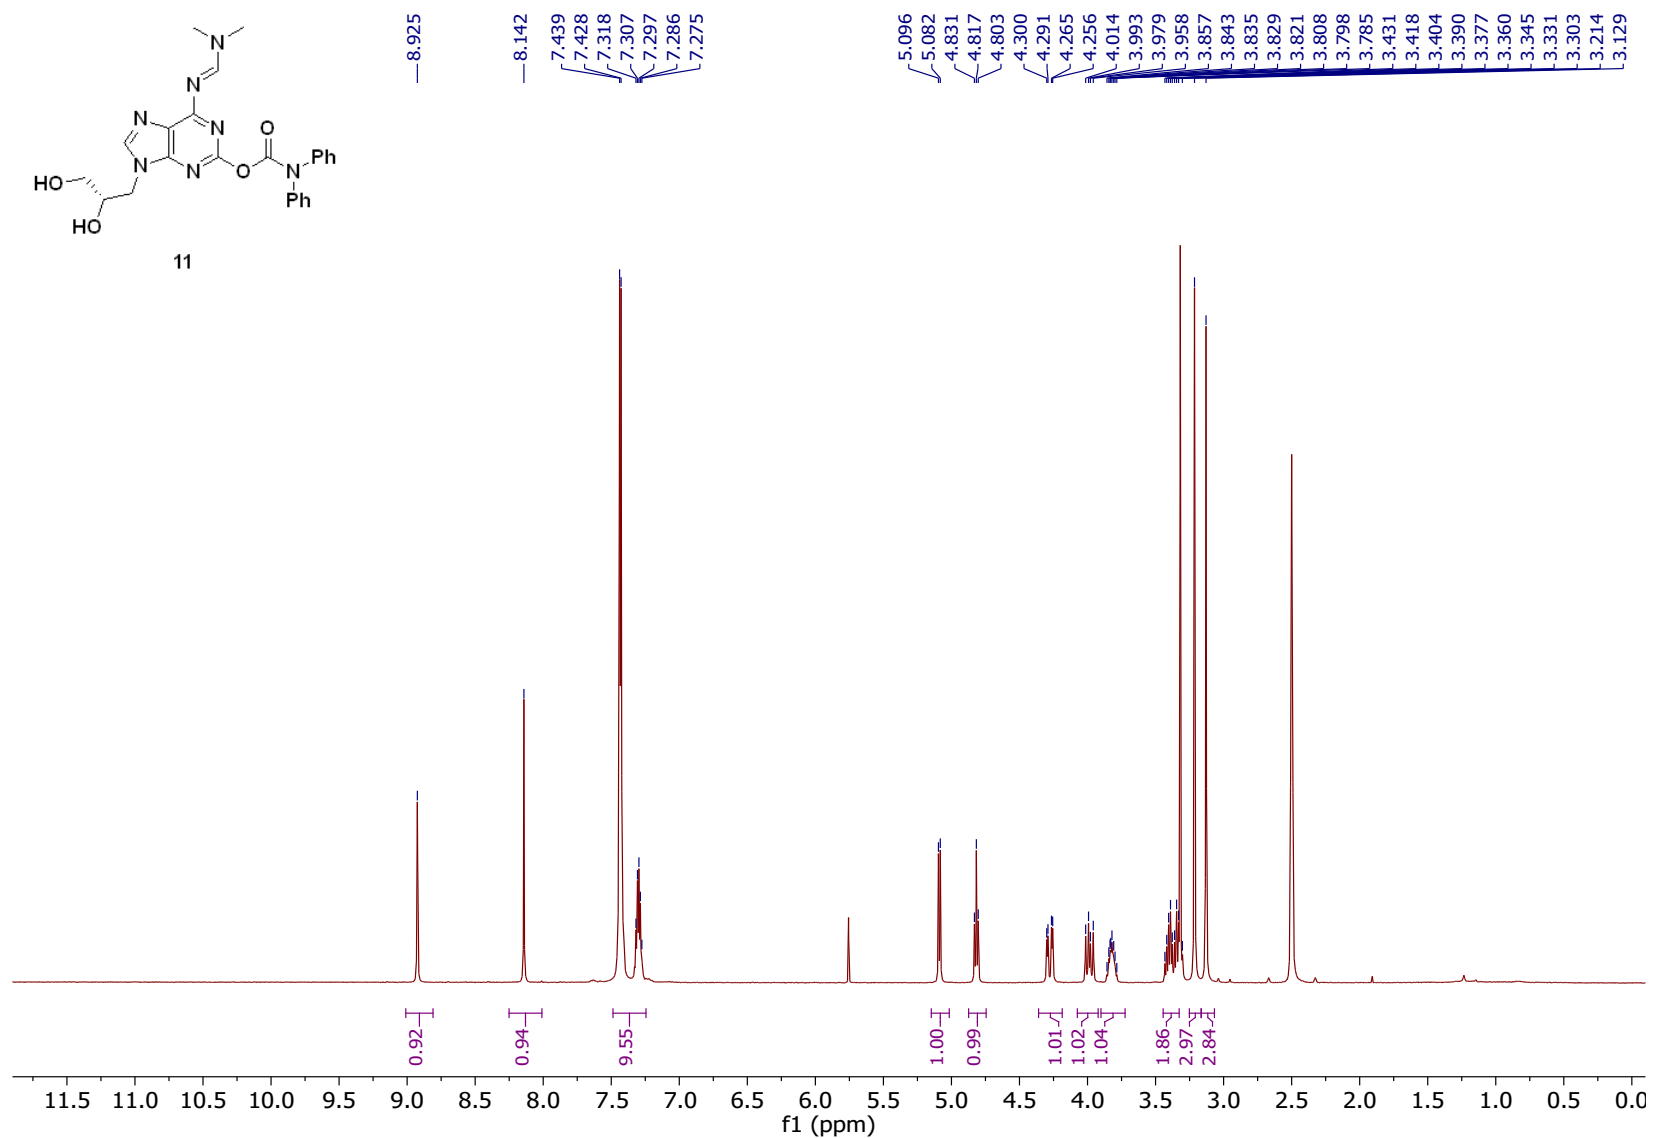

$^{13}\text{C}$  NMR spectrum of compound **11** (126 MHz,  $\text{DMSO-}d_6$ )

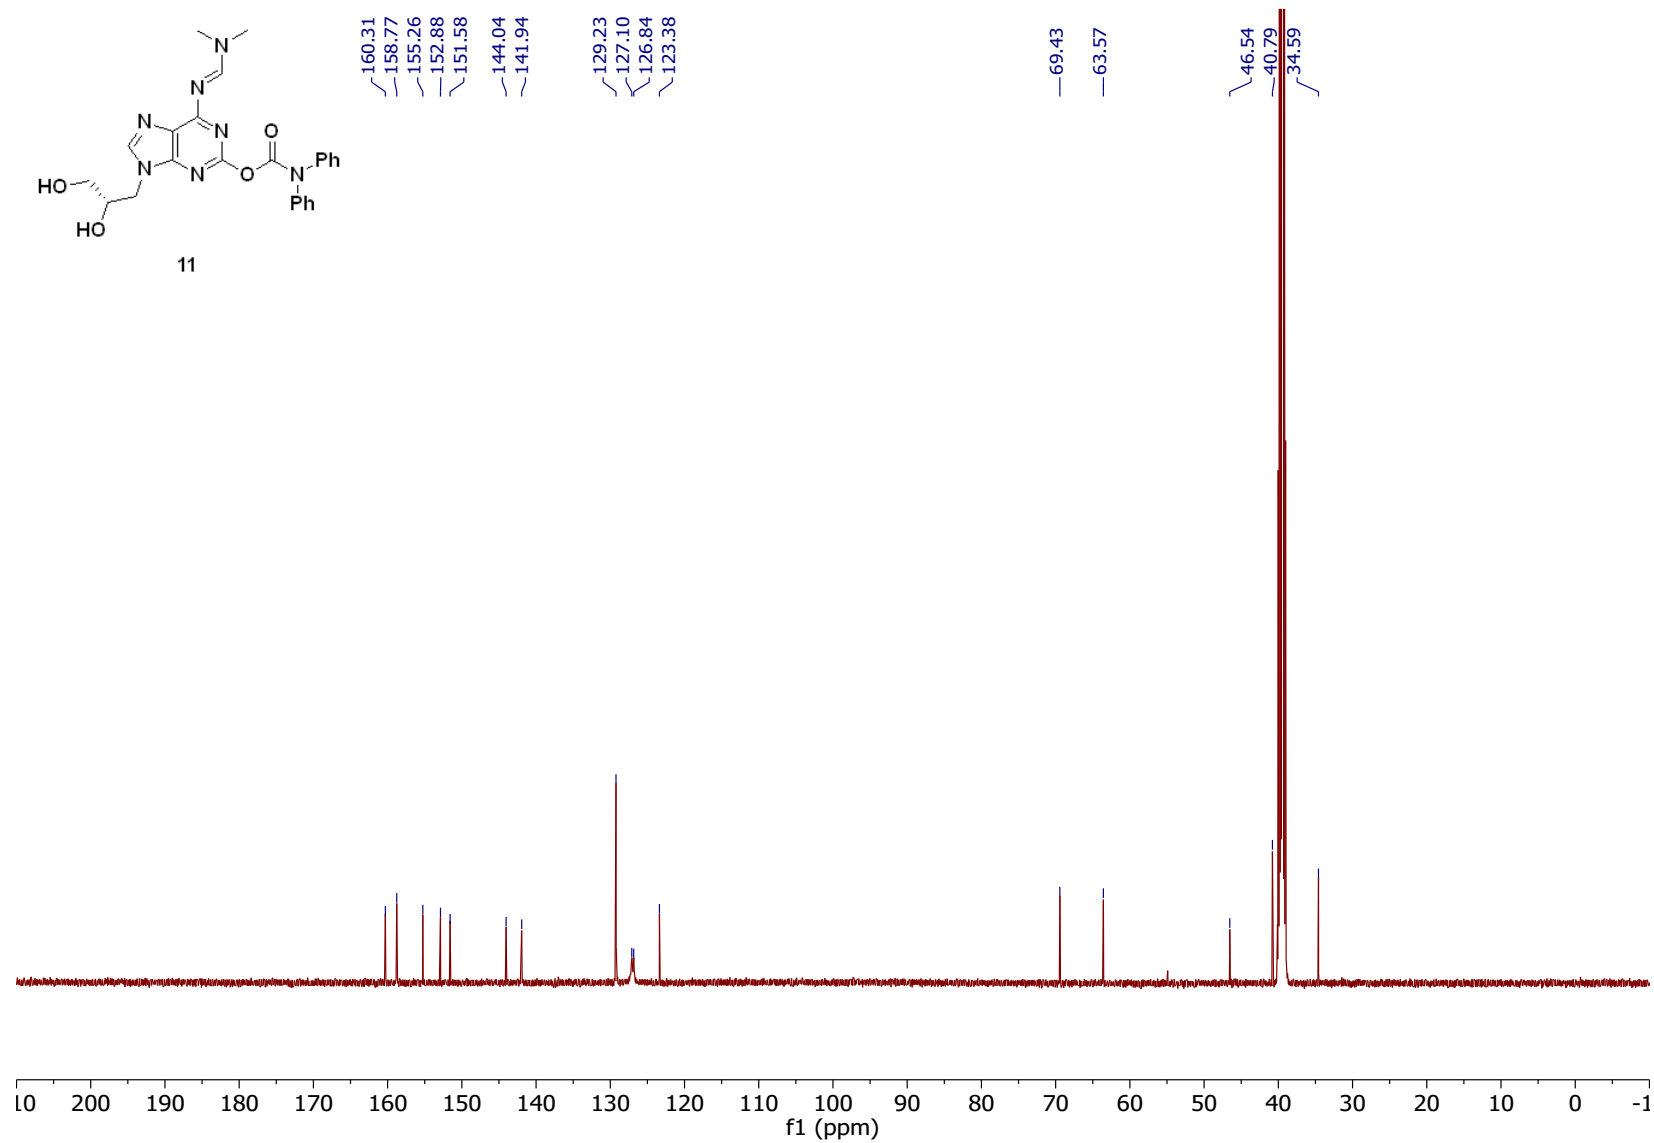



<sup>1</sup>H NMR spectrum of compound **12** (400 MHz, DMSO-*d*<sub>6</sub>)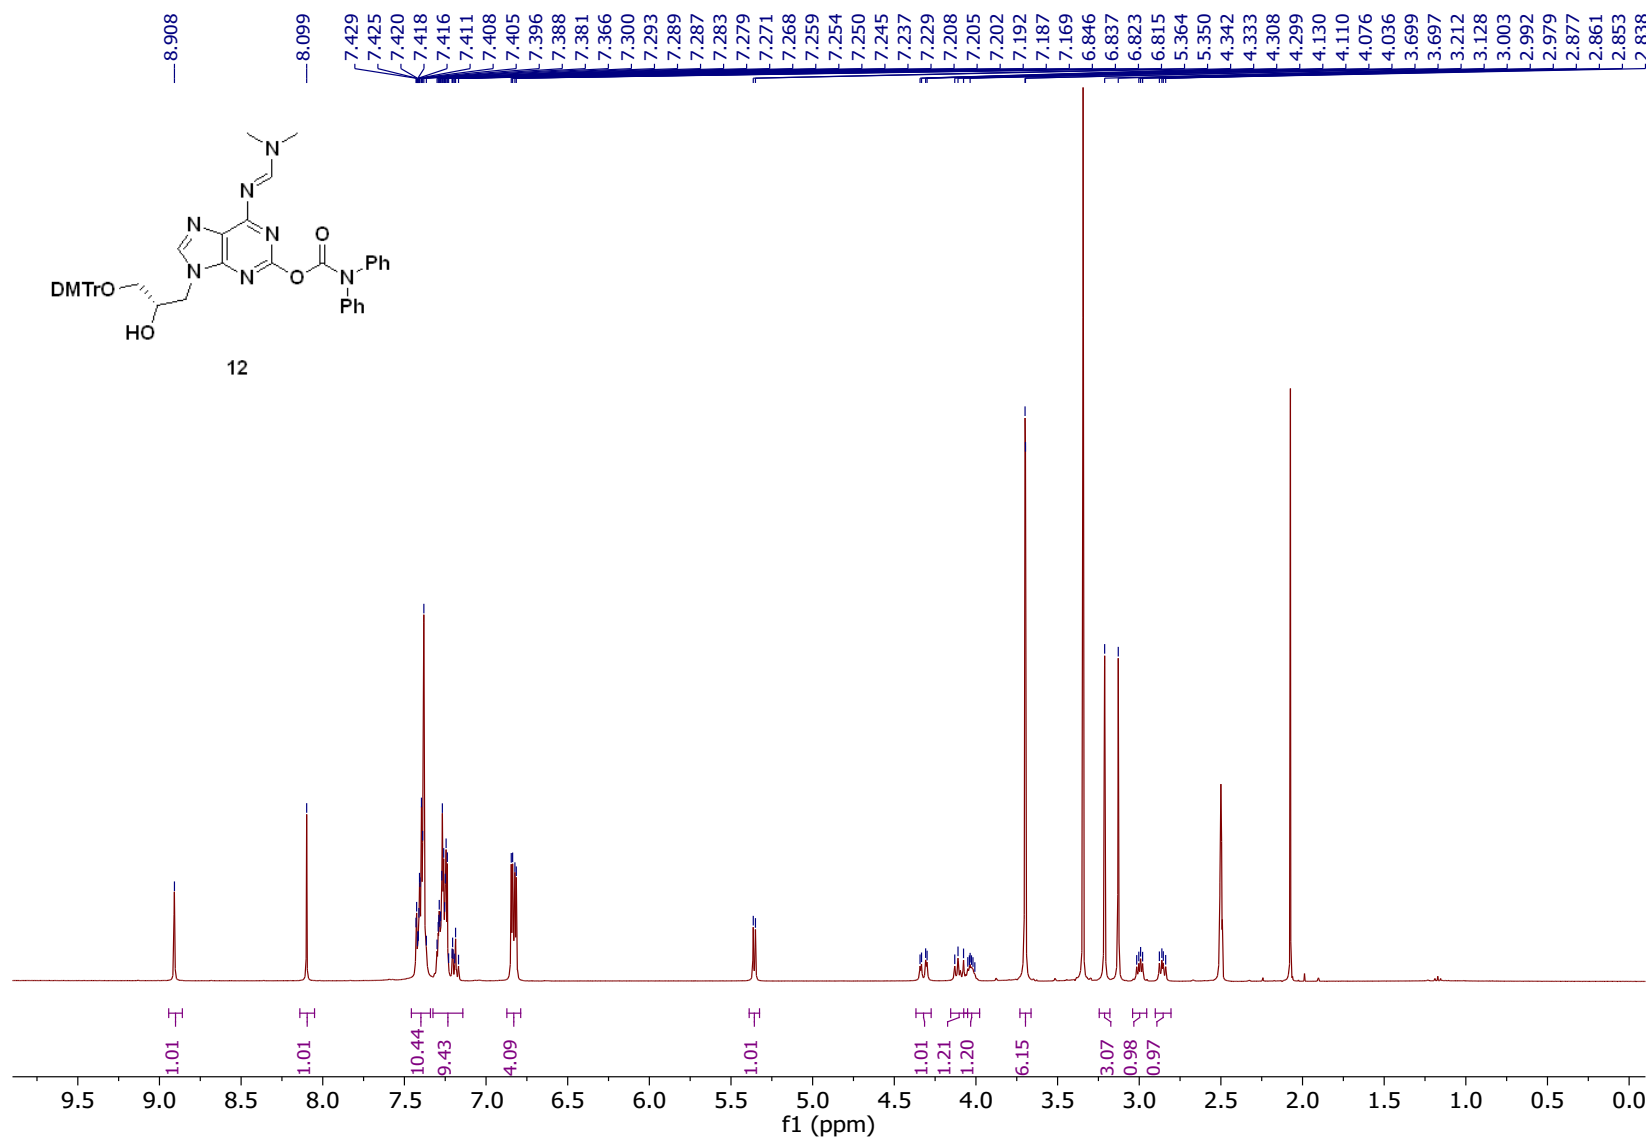

$^{13}\text{C}$  NMR spectrum of compound **12** (101 MHz,  $\text{DMSO-}d_6$ )

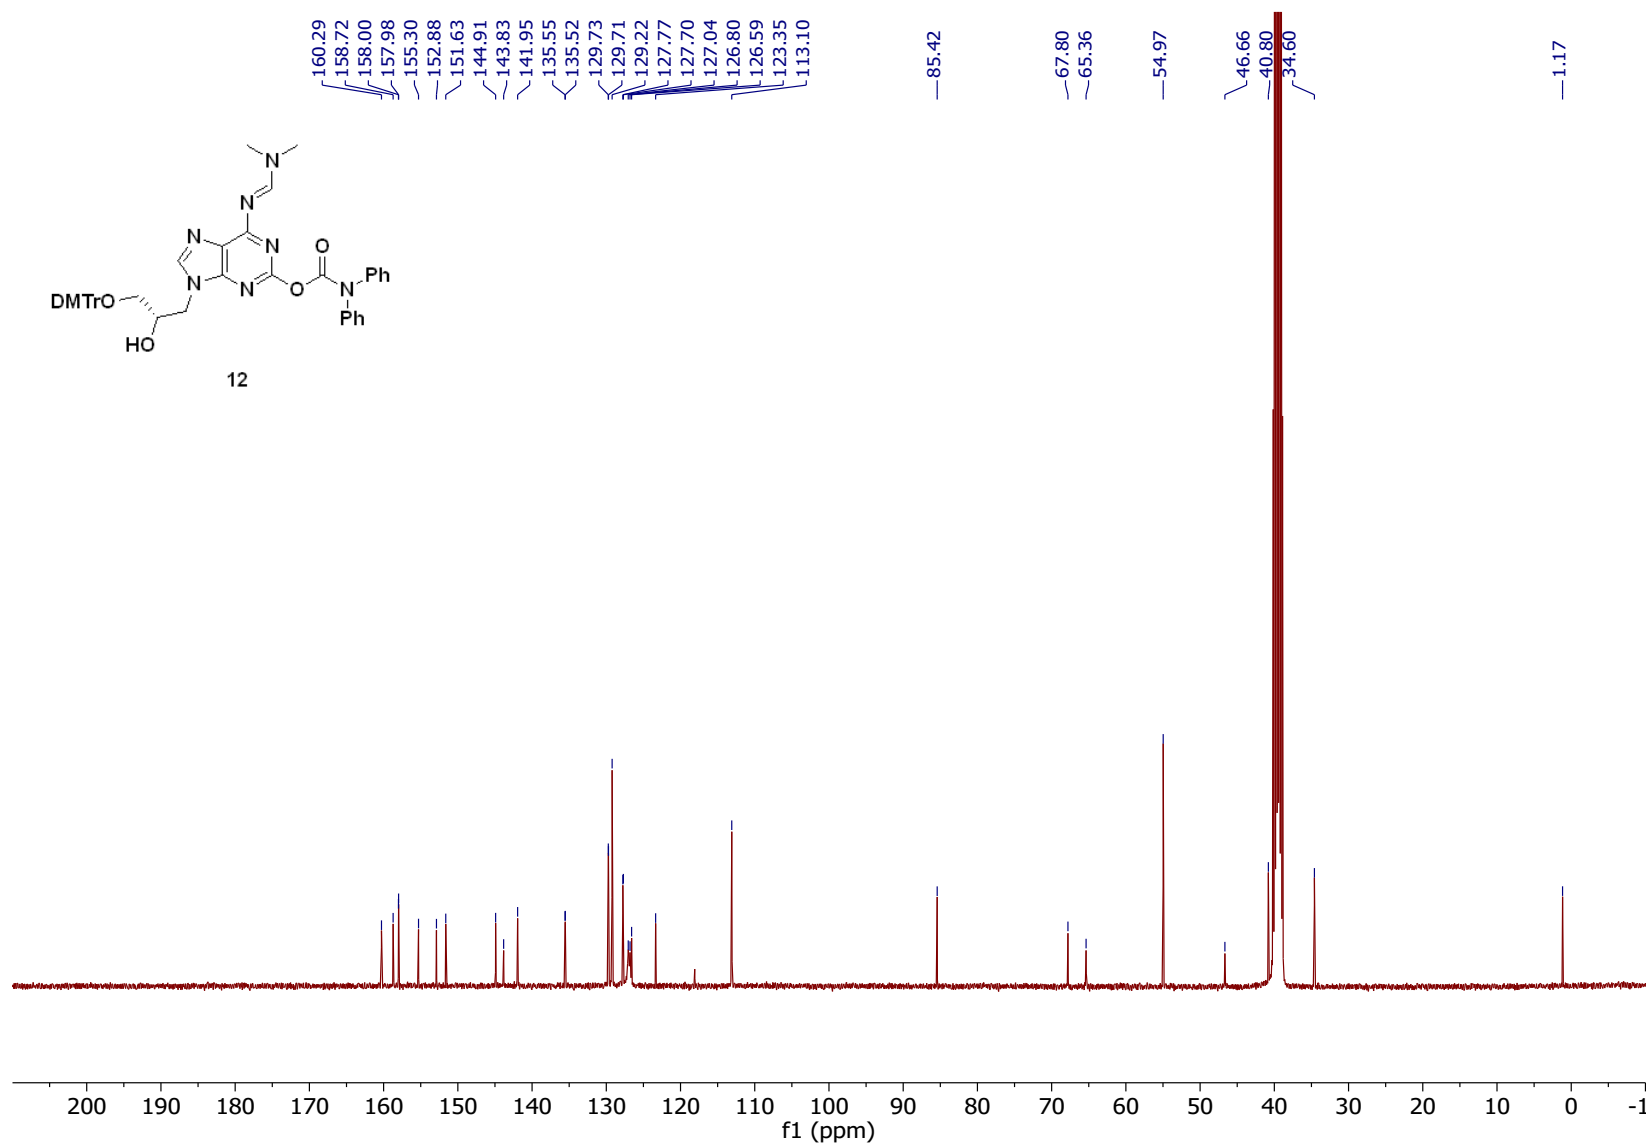

<sup>1</sup>H NMR spectrum of phosphoramidite **iG** (500 MHz, CD<sub>3</sub>CN)

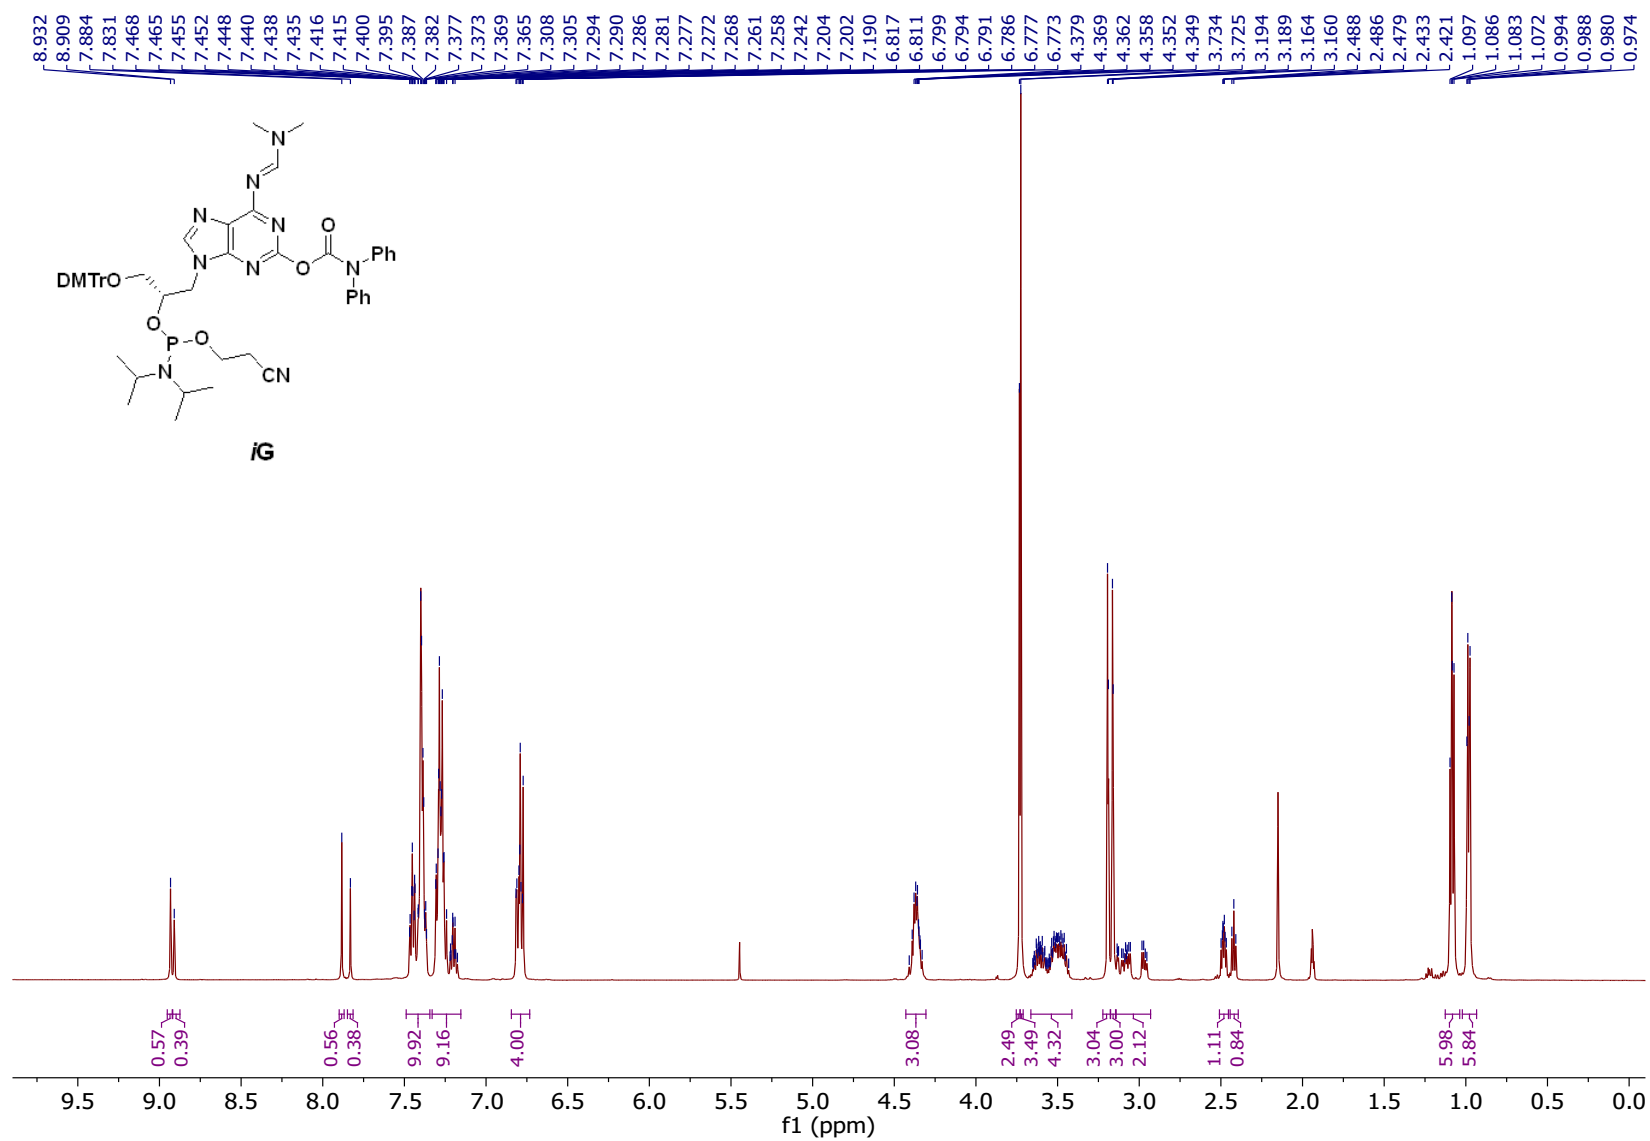

$^{13}\text{C}$  NMR spectrum of phosphoramidite **iG** (126 MHz,  $\text{CD}_3\text{CN}$ )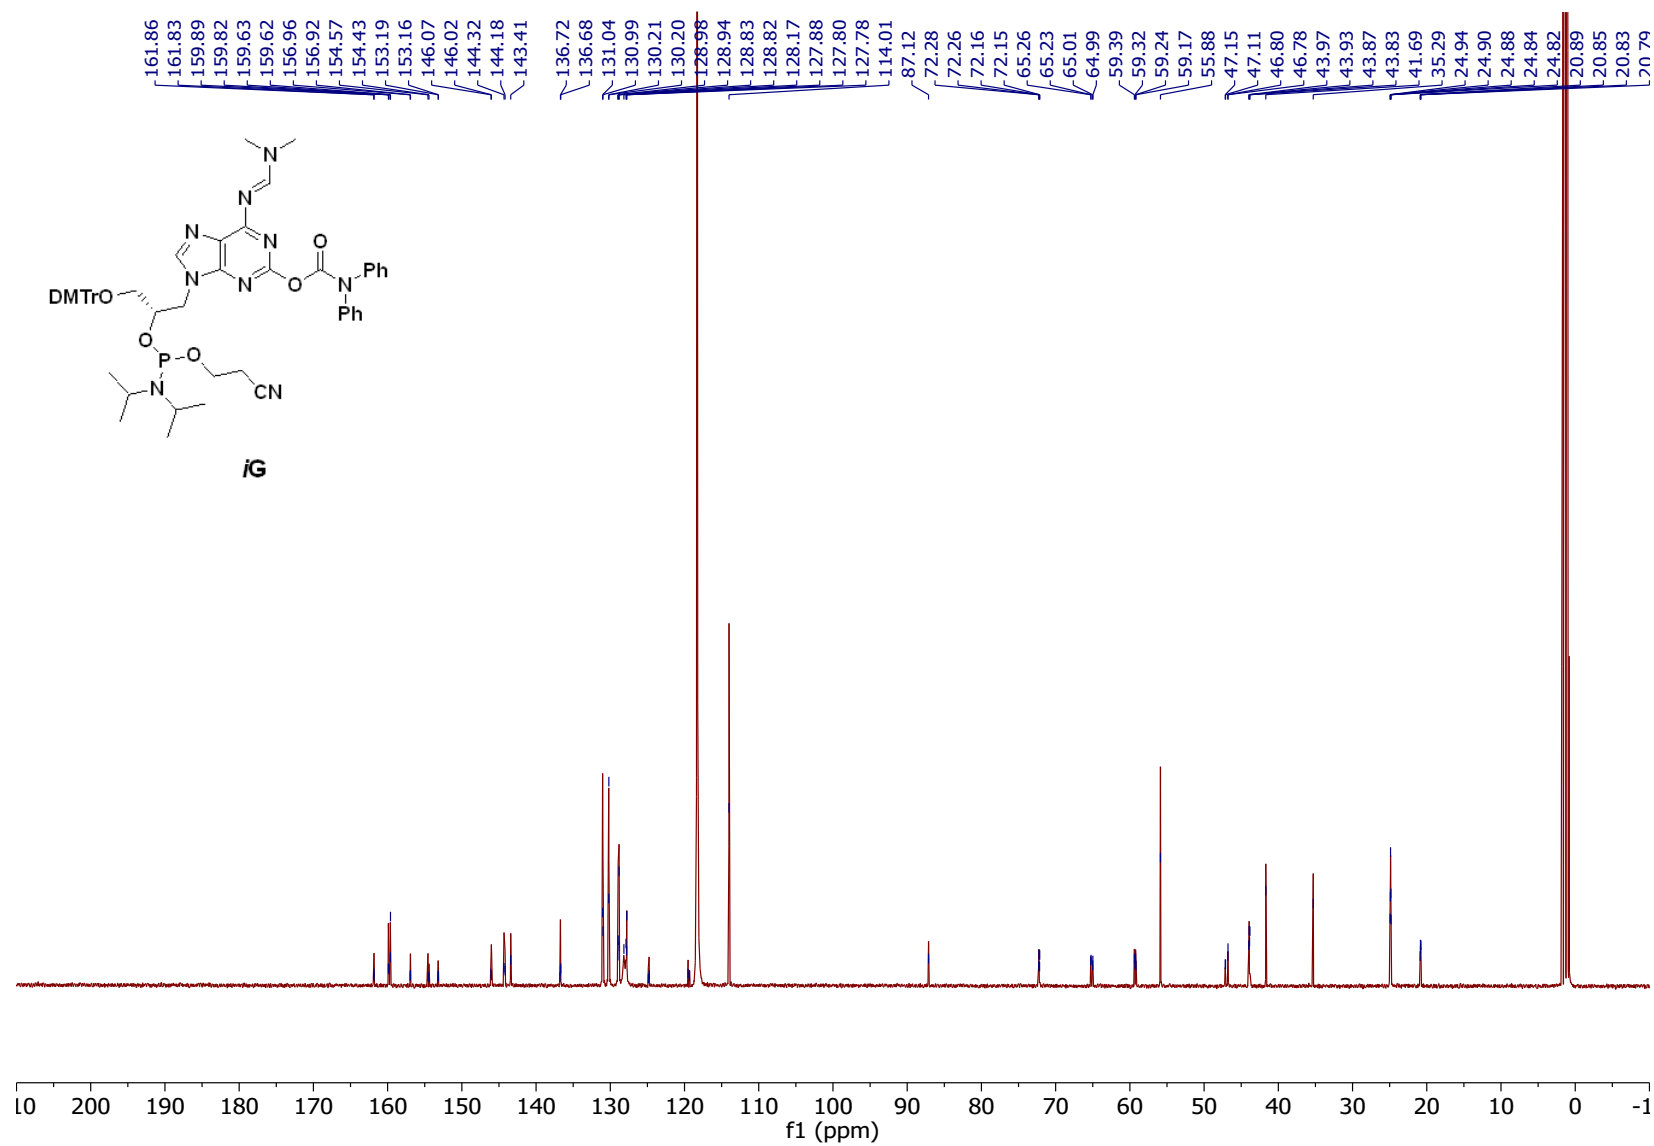

$^{31}\text{P}$  NMR spectrum of phosphoramidite **iG** (202 MHz,  $\text{CD}_3\text{CN}$ )

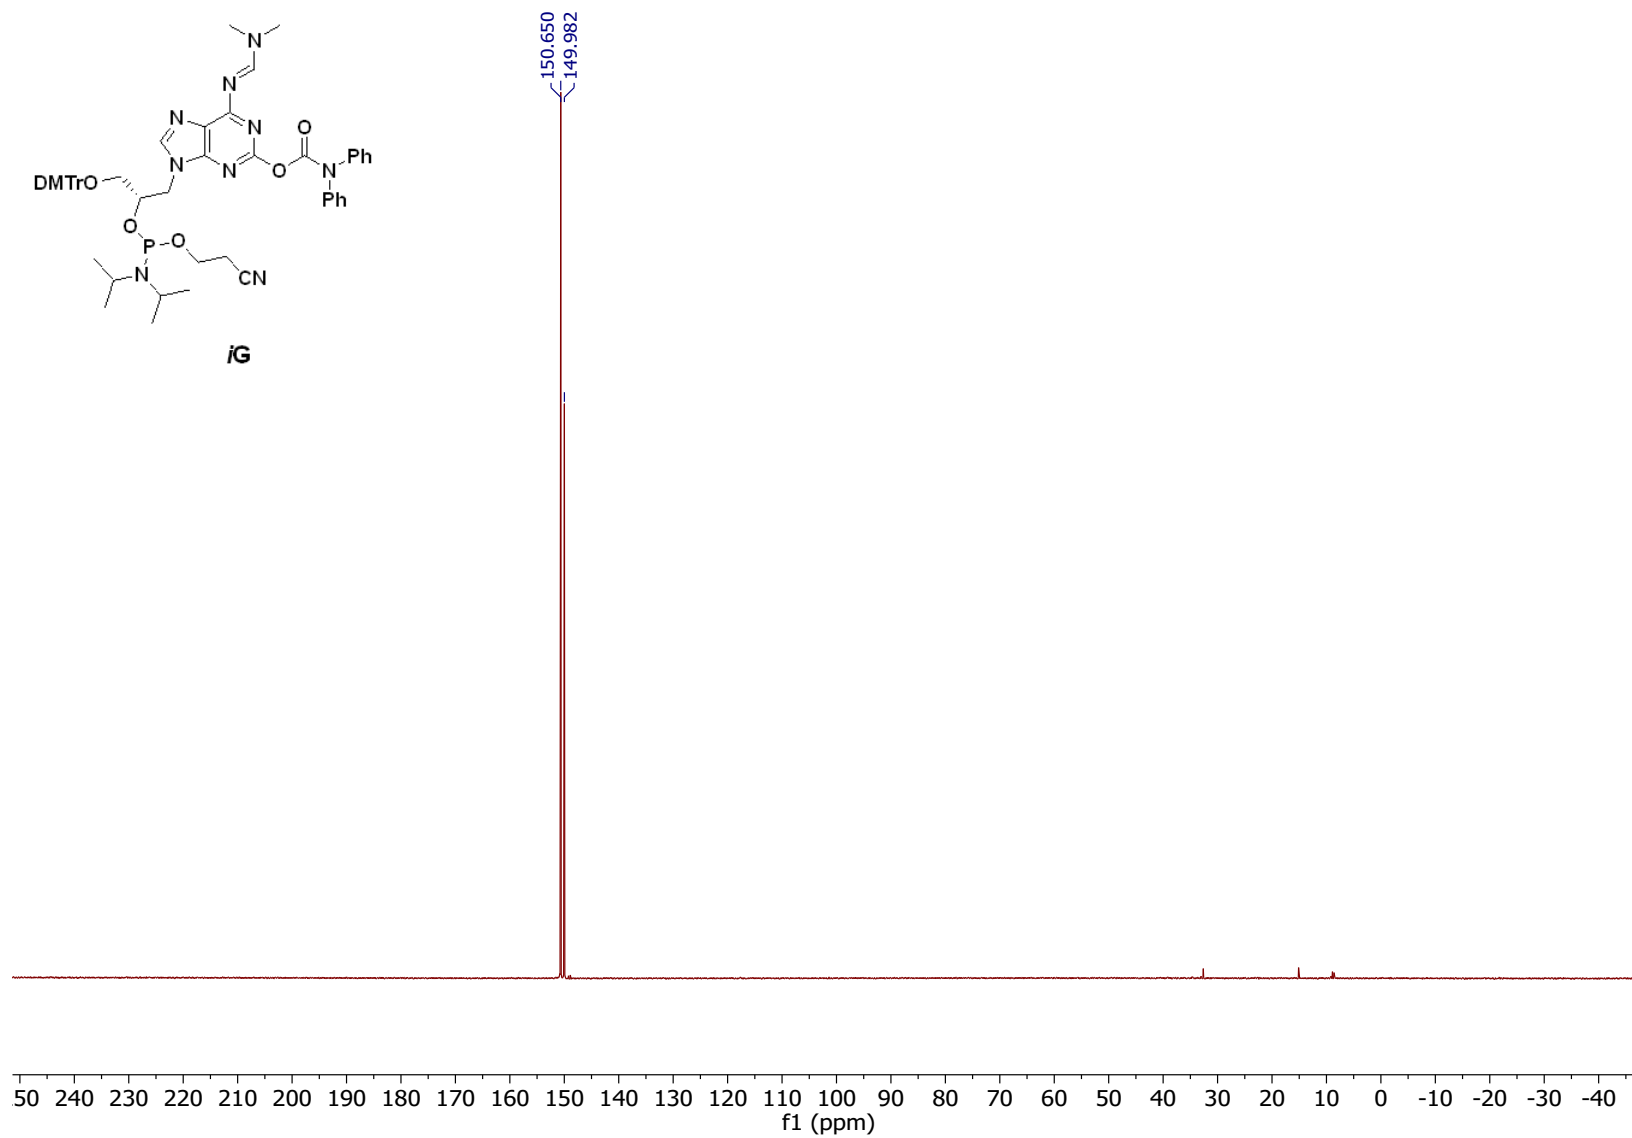

Supplement: gkab916_supplemental_file.pdf [file gkab916_supplemental_file.pdf]
